# Supplementary material for: Exploring aromatic rings with planar tetracoordinate group 13–15 atoms
Source: Royal Society of Chemistry journal article supplement (doi:10.1039/d4cc02780a), 2024-01-01
Supplement: d4cc02780a1.pdf [file d4cc02780a1.pdf]

## Supplementary Information

# Exploring Aromatic Rings with Planar Tetracoordinate Group 13-15 Elements

Dumer S. Sacanamboy,<sup>a,b</sup> Pamela L. Gamero-Begazo,<sup>b</sup> Kevin E. Parco-Valencia,<sup>b</sup> Diego Inostroza,<sup>c</sup> Lina Ruiz,<sup>d</sup> Luis Leyva-Parra,<sup>e\*</sup> Gabriel Merino,<sup>f\*</sup> and William Tiznado<sup>a\*</sup>

<sup>a</sup> *Universidad Andrés Bello, Facultad de Ciencias Exactas, Departamento de Ciencias Químicas, Centro de Química Teórica & Computacional (CQT&C), Avenida República 275, 8370146 Santiago de Chile., Chile.*  
[wtiznado@unab.cl](mailto:wtiznado@unab.cl)

<sup>b</sup> *Doctorado en Fisicoquímica Molecular, Facultad de Ciencias Exactas, Universidad Andres Bello, República 275, Santiago de Chile, Chile.*

<sup>c</sup> *Laboratoire de Chimie Théorique, LCT, Sorbonne Université, CNRS, F-75005 Paris, France*

<sup>d</sup> *Instituto de Ciencias Biomédicas, Facultad de Ciencias de la Salud, Universidad Autónoma de Chile, Santiago de Chile, Chile.*

<sup>e</sup> *Facultad de Ingeniería y Arquitectura, Universidad Central de Chile (UCEN), Santa Isabel 1186, 8370146, Santiago, Chile.* [luis.leyva@ucentral.cl](mailto:luis.leyva@ucentral.cl)

<sup>f</sup> *Departamento de Física Aplicada, Centro de Investigación y de Estudios Avanzados Mérida Km. 6 Antigua carretera a Progreso Apdo. Postal 73, Cordemex, 97310, Mérida, Yuc., México.* [gmerino@cinvestav.mx](mailto:gmerino@cinvestav.mx)

## Computational Details

We systematically explored the potential energy surface using AUTOMATON,<sup>1</sup> which employs probabilistic cellular automata to generate initial structures and genetic algorithms to evolve them towards the global minimum. Calculations for singlet and triplet states were performed at the PBE0<sup>2</sup>-D3<sup>3</sup>/SDDAII<sup>4-8</sup> level. The lowest energy structures (Figure S1-S18) were minimized at the PBE0-D3/def2-TZVP<sup>9</sup> level. For accurate energy comparisons, we conducted single-point energy calculations at the DLPNO-CCSD(T)<sup>10-12</sup>/CBS<sup>13, 14</sup>//PBE0-D3/def2-TZVP level via Gaussian 16 software.<sup>15</sup> Chemical bonding was analyzed using the Adaptive Natural Density Partitioning<sup>16-18</sup> (AdNDP) technique via Multiwfn software.<sup>19</sup> Structure and AdNDP orbitals were visualized using CYLview 2.0<sup>20</sup> and VMD 1.9.3.<sup>21</sup>

The Interacting Quantum Atoms (IQA) method<sup>22-25</sup> decomposed interaction energies, considering atomic deformation and interatomic interactions, and was performed at the PBE0-D3/def2-TZVP level using AIMAll.<sup>26</sup> The interaction energy ( $V_{IQA}^{int}$ ) consists of Coulombic ( $V_C^{int}$ ) and exchange-correlation ( $V_{XC}^{int}$ ) terms, where  $V_C^{int}$  reflects electrostatic interaction between electrons and nuclei in a pair of basins, including nuclear repulsion, electron-nucleus attraction, and the Coulomb part of electron-electron repulsion.  $V_{XC}^{int}$  is purely quantum mechanical, depending on the exchange-correlation part of electron-electron interaction. Typically,  $V_C^{int}$  is associated with ionic-type interactions, while  $V_{XC}^{int}$  relates to covalent-type interactions.

Magnetically induced current densities were calculated using the AIMAll program<sup>26</sup> at the PBE0-D3/def2-TZVP level, with the external magnetic field aligned along the z-axis, orthogonal to the molecular plane. In our analysis, diatropic (aromatic) and paratropic (antiaromatic) ring currents circulate clockwise and counterclockwise, respectively. Visualization of these currents was performed with Paraview 5.10.0 software.<sup>27</sup>

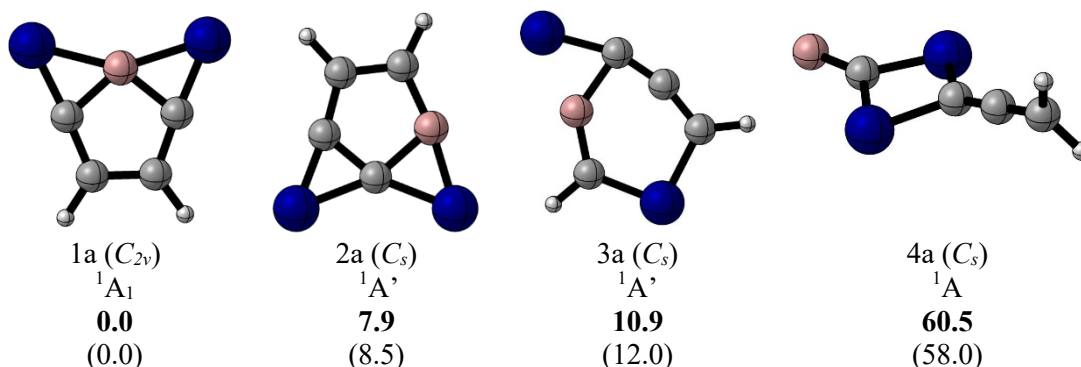

**Figures S1.** Global minimum and low-lying isomers of  $C_4H_2Si_2B^-$ , their point group symmetries and spectroscopic states. Relative energies are shown in kcal/mol at DLPNO-CCSD(T)/CSB//PBE0-D3/def2-TZVP (**in bold**) and PBE0-D3/def2-TZVP (in parentheses) levels, including zero-point energy (ZPE) corrections. A number-letter label identifies structure to facilitates their connection with their Cartesian coordinates (at the end of the ESI).

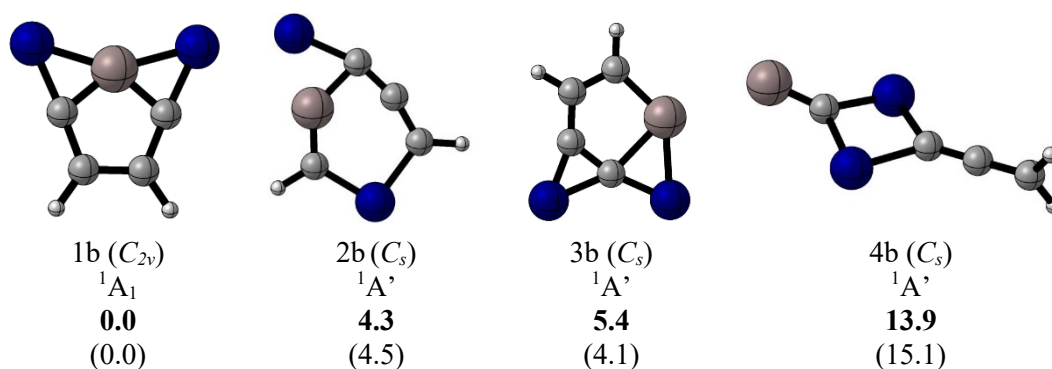

**Figures S2.** Global minimum and low-lying isomers of  $C_4H_2Si_2Al^-$ , their point group symmetries and spectroscopic states. Relative energies are shown in kcal/mol at DLPNO-CCSD(T)/CSB//PBE0-D3/def2-TZVP (**in bold**) and PBE0-D3/def2-TZVP (in parentheses) levels, including zero-point energy (ZPE) corrections.

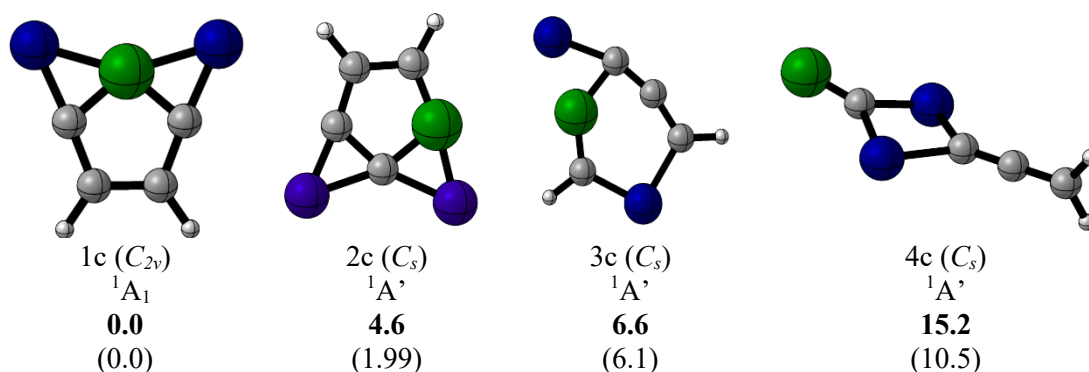

**Figures S3.** Global minimum and low-lying isomers of  $C_4H_2Si_2Ga^-$ , their point group symmetries and spectroscopic states. Relative energies are shown in kcal/mol at DLPNO-CCSD(T)/CSB//PBE0-D3/def2-TZVP (**in bold**) and PBE0-D3/def2-TZVP (in parentheses) levels, including zero-point energy (ZPE) corrections.

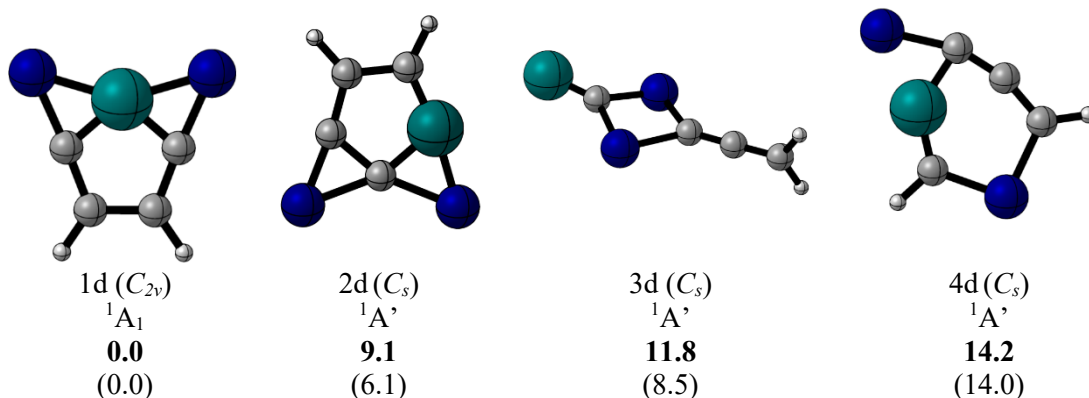

**Figures S4.** Global minimum and low-lying isomers of  $C_4H_2Si_2In^-$ , their point group symmetries and spectroscopic states. Relative energies are shown in kcal/mol at DLPNO-CCSD(T)/CSB//PBE0-D3/def2-TZVP (**in bold**) and PBE0-D3/def2-TZVP (in parentheses) levels, including zero-point energy (ZPE) corrections.

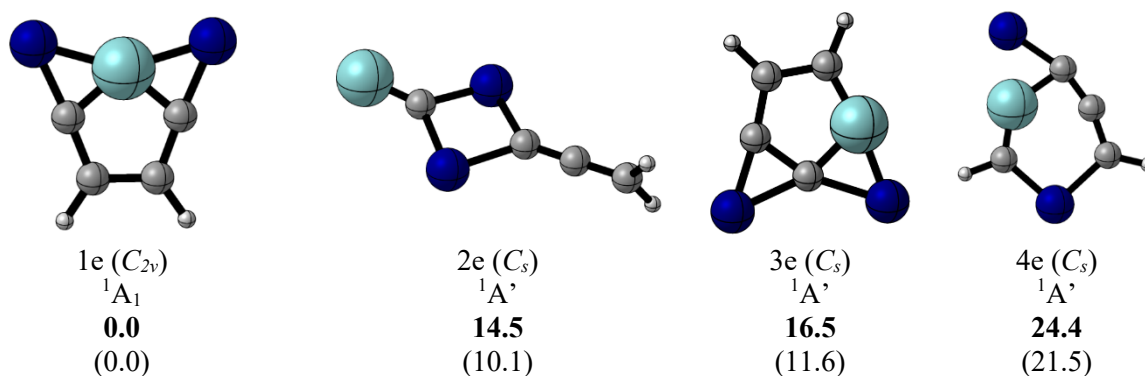

**Figures S5.** Global minimum and low-lying isomers of  $C_4H_2Si_2Tl^-$ , their point group symmetries and spectroscopic states. Relative energies are shown in kcal·mol<sup>-1</sup> at DLPNO-CCSD(T)/CSB//PBE0-D3/def2-TZVP (**in bold**) and PBE0-D3/def2-TZVP (in parentheses) levels, including zero-point energy (ZPE) corrections.

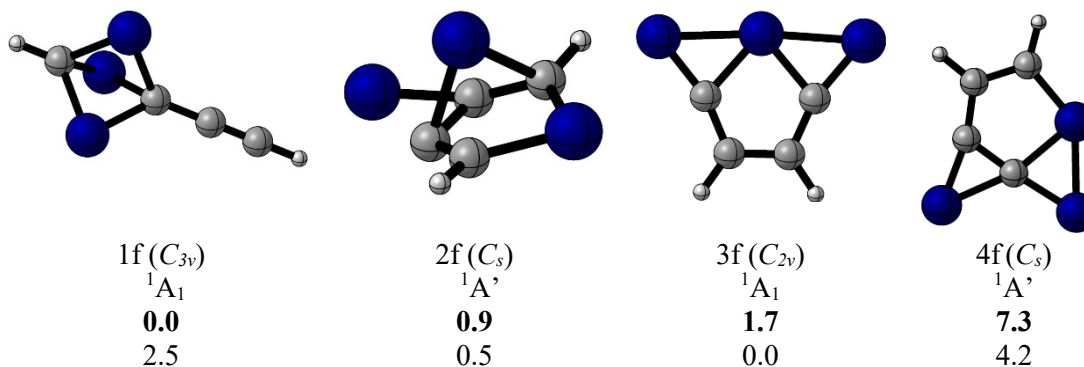

**Figures S6.** Global minimum and low-lying isomers of  $C_4H_2Si_3$ , their point group symmetries and spectroscopic states. Relative energies are shown in kcal/mol at DLPNO-CCSD(T)/CSB//PBE0-D3/def2-TZVP (**in bold**) and PBE0-D3/def2-TZVP (in parentheses) levels, including zero-point energy (ZPE) corrections.



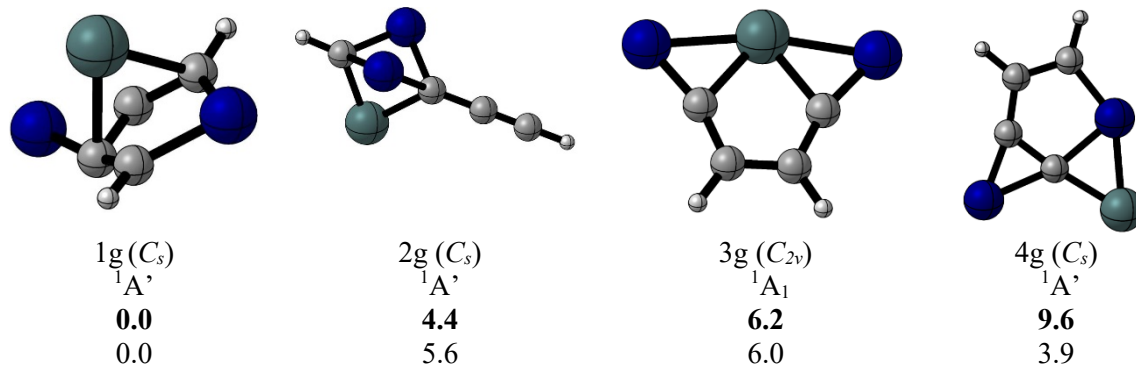

**Figures S7.** Global minimum and low-lying isomers of  $C_4H_2Si_2Ge$ , their point group symmetries and spectroscopic states. Relative energies are shown in kcal/mol at DLPNO-CCSD(T)/CSB//PBE0-D3/def2-TZVP (**in bold**) and PBE0-D3/def2-TZVP (in parentheses) levels, including zero-point energy (ZPE) corrections.

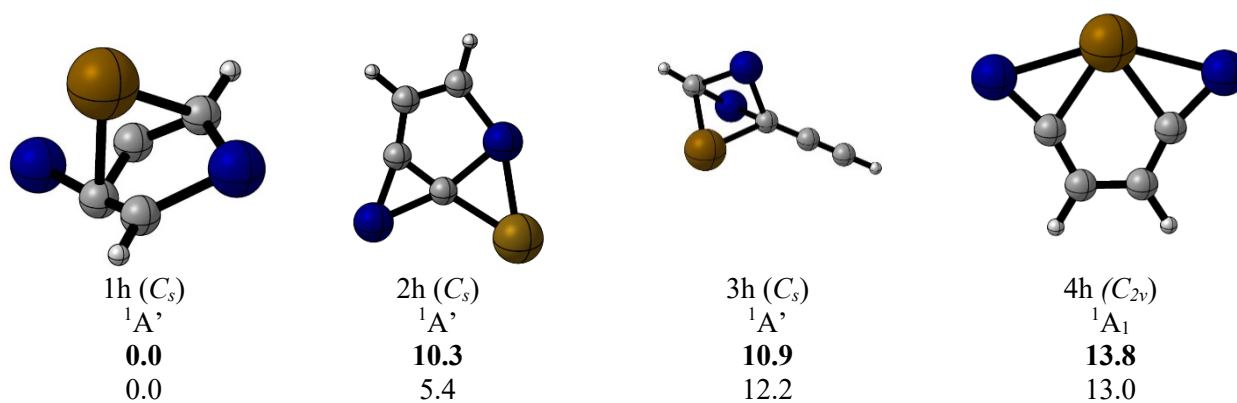

**Figures S8.** Global minimum and low-lying isomers of  $C_4H_2Si_2Sn$ , their point group symmetries and spectroscopic states. Relative energies are shown in kcal/mol at DLPNO-CCSD(T)/CSB//PBE0-D3/def2-TZVP (**in bold**) and PBE0-D3/def2-TZVP (in parentheses) levels, including zero-point energy (ZPE) corrections.

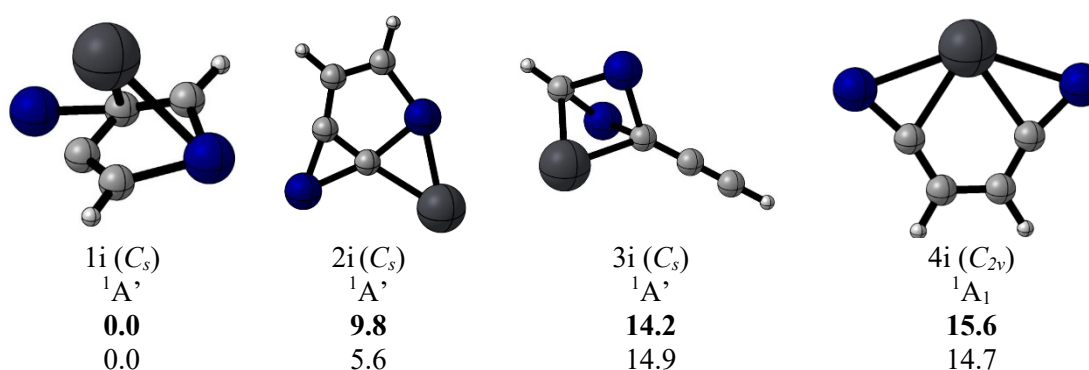

**Figures S9.** Global minimum and low-lying isomers of  $C_4H_2Si_2Pb$  cluster, their point group symmetries and spectroscopic states. Relative energies are shown in kcal/mol at DLPNO-CCSD(T)/CSB//PBE0-D3/def2-TZVP (**in bold**) and PBE0-D3/def2-TZVP (in parentheses) levels including zero-point energy (ZPE) corrections. A number-letter label identifies structure to facilitates their connection with their Cartesian coordinates (at the end of the ESI).

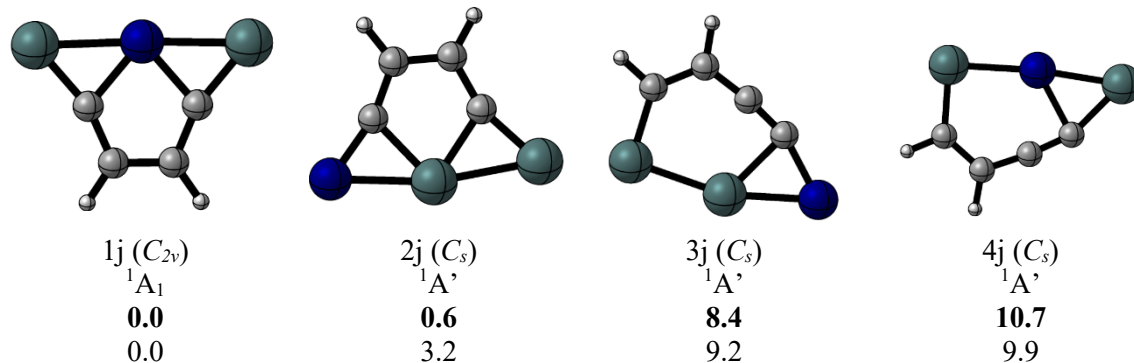

**Figures S10.** Global minimum and low-lying isomers of  $C_4H_2Ge_2Si$ , their point group symmetries and spectroscopic states. Relative energies are shown in kcal/mol at DLPNO-CCSD(T)/CSB//PBE0-D3/def2-TZVP (**in bold**) and PBE0-D3/def2-TZVP (in parentheses) levels, including zero-point energy (ZPE) corrections.

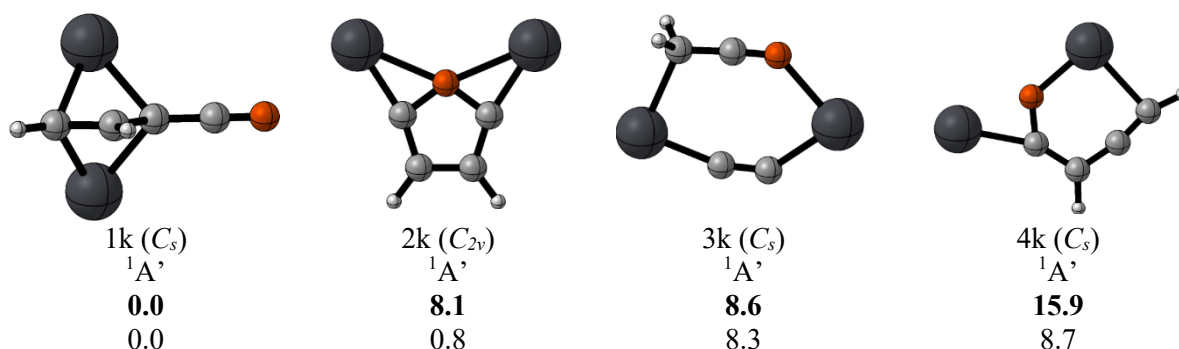

**Figures S11.** Global minimum and low-lying isomers of  $C_4H_2Pb_2N^+$ , their point group symmetries and spectroscopic states. Relative energies are shown in kcal/mol at DLPNO-CCSD(T)/CSB//PBE0-D3/def2-TZVP (**in bold**) and PBE0-D3/def2-TZVP (in parentheses) levels, including zero-point energy (ZPE) corrections.

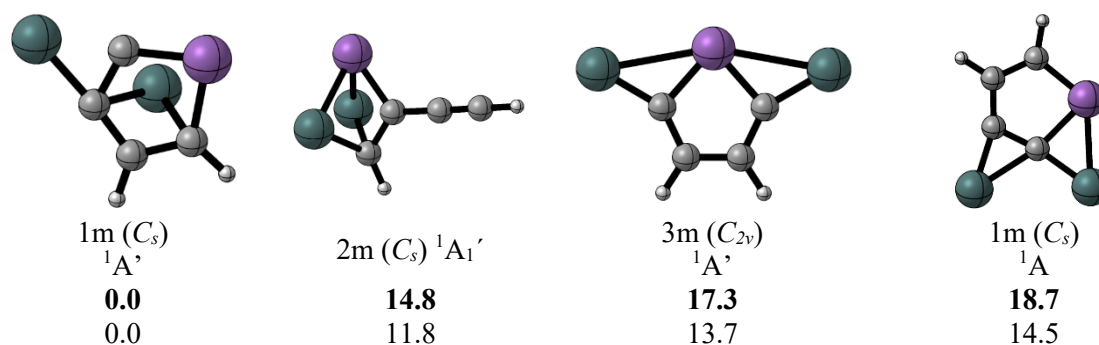

**Figures S12.** Global minimum and low-lying isomers of  $C_4H_2Ge_2As^+$ , their point group symmetries and spectroscopic states. Relative energies are shown in kcal/mol at DLPNO-CCSD(T)/CSB//PBE0-D3/def2-TZVP (**in bold**) and PBE0-D3/def2-TZVP (in parentheses) levels, including zero-point energy (ZPE) corrections.

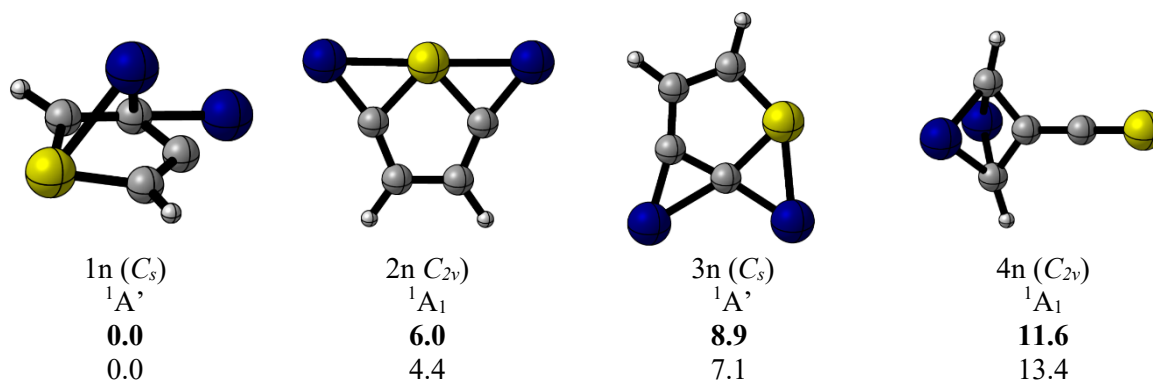

**Figures S13.** Global minimum and low-lying isomers of  $C_4H_2Si_2P^+$ , their point group symmetries and spectroscopic states. Relative energies are shown in kcal/mol at DLPNO-CCSD(T)/CSB//PBE0-D3/def2-TZVP (**in bold**) and PBE0-D3/def2-TZVP (in parentheses) levels, including zero-point energy (ZPE) corrections.

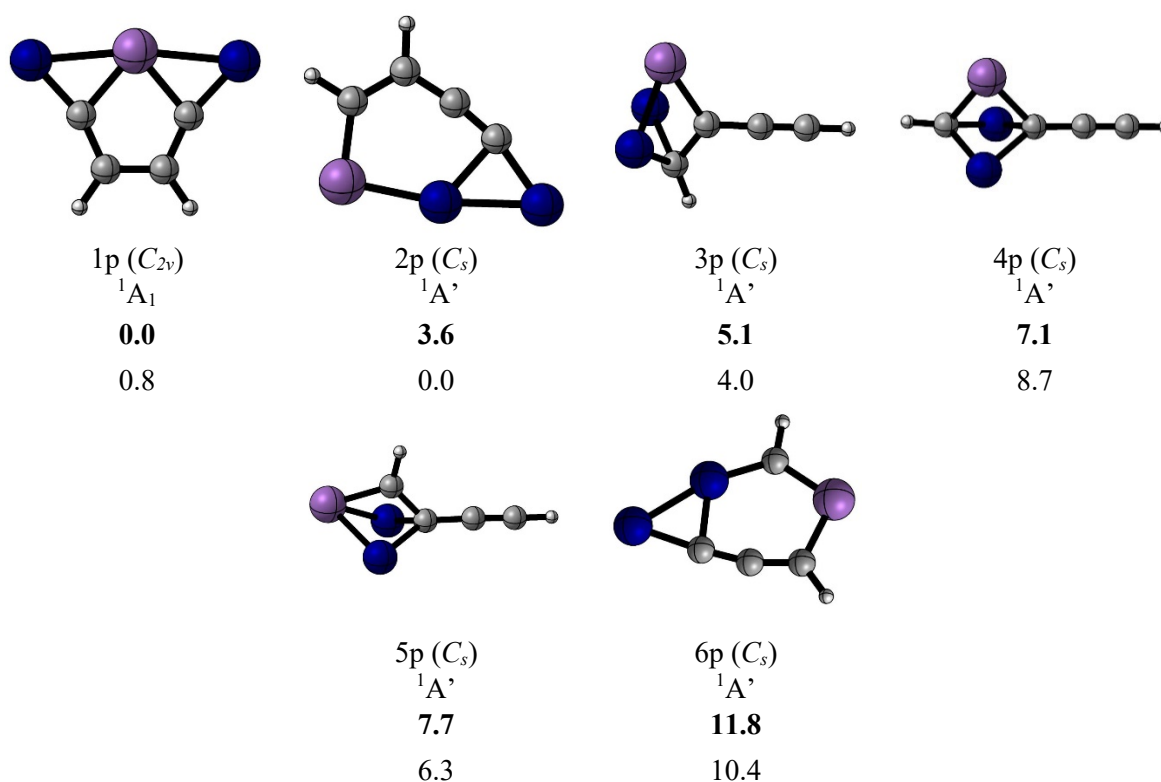

**Figures S14.** Global minimum and low-lying isomers of  $C_4H_2Si_2As^+$ , their point group symmetries and spectroscopic states. Relative energies are shown in kcal/mol at DLPNO-CCSD(T)/CSB//PBE0-D3/def2-TZVP (**in bold**) and PBE0-D3/def2-TZVP (in parentheses) levels, including zero-point energy (ZPE) corrections.

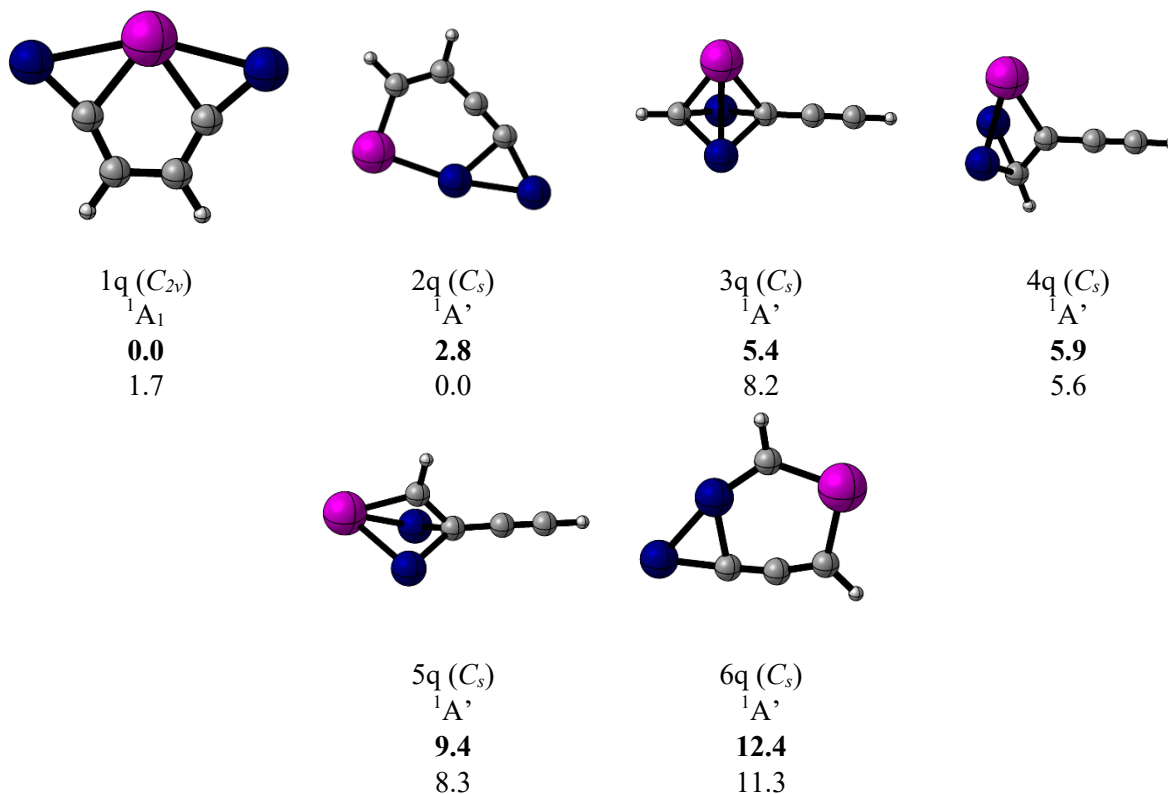

**Figures S15.** Global minimum and low-lying isomers of  $C_4H_2Si_2Sb^+$ , their point group symmetries and spectroscopic states. Relative energies are shown in kcal/mol at DLPNO-CCSD(T)/CSB//PBE0-D3/def2-TZVP (**in bold**) and PBE0-D3/def2-TZVP (in parentheses) levels, including zero-point energy (ZPE) corrections.

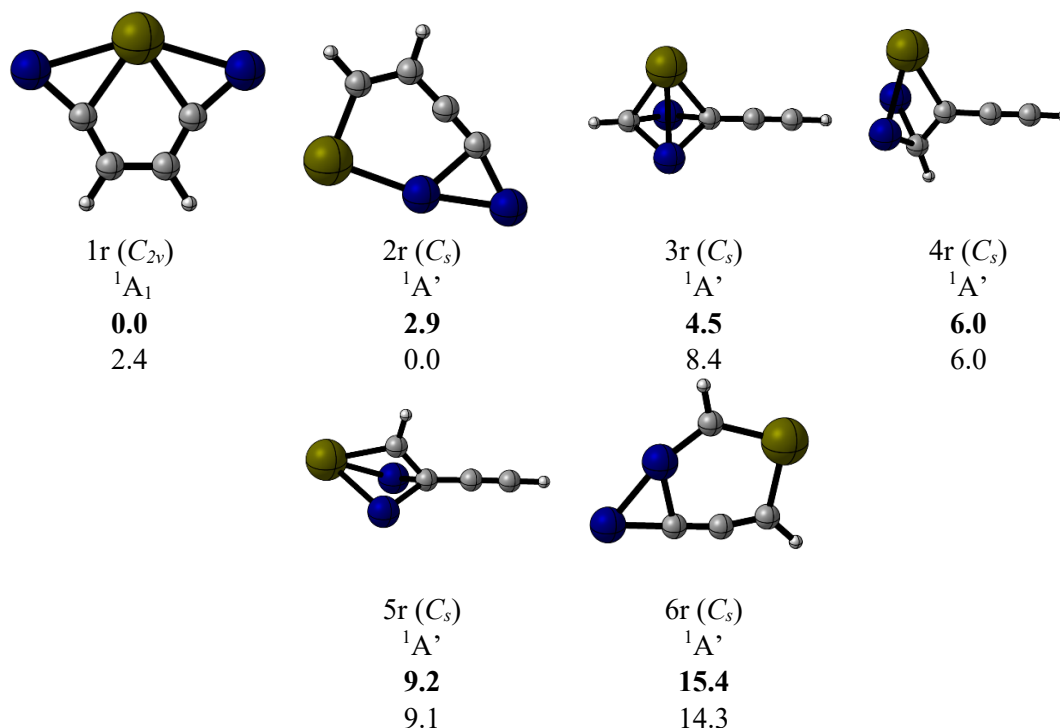

**Figures S16.** Global minimum and low-lying isomers of  $C_4H_2Si_2Bi^+$ , their point group symmetries and spectroscopic states. Relative energies are shown in kcal/mol at DLPNO-CCSD(T)/CSB//PBE0-D3/def2-TZVP (**in bold**) and PBE0-D3/def2-TZVP (in parentheses) levels, including zero-point energy (ZPE) corrections.

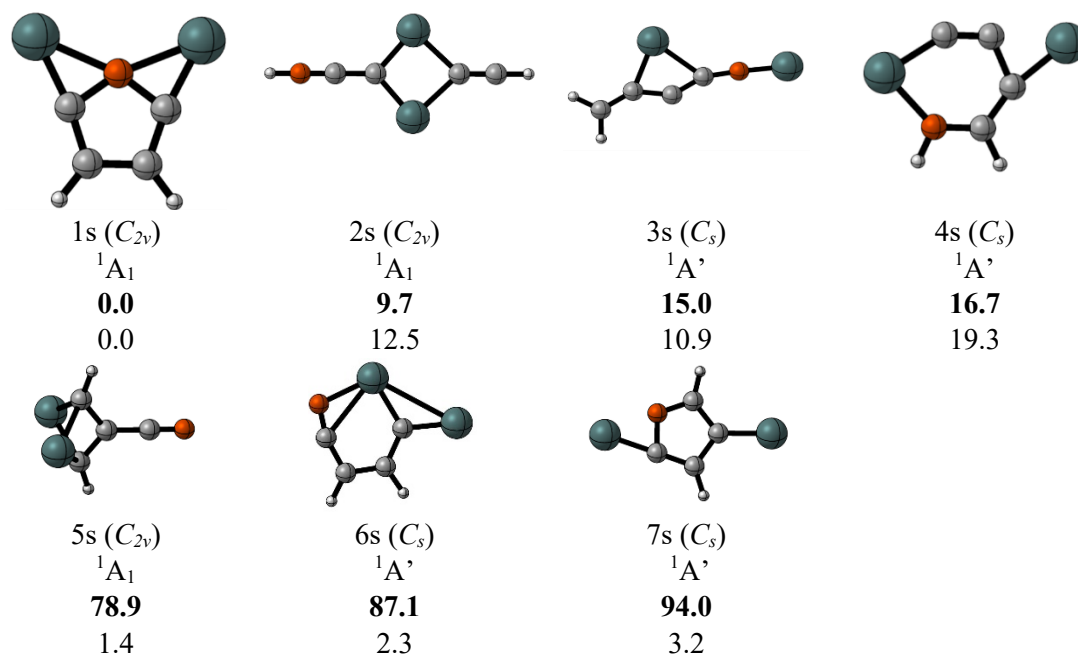

**Figures S17.** Global minimum and low-lying isomers of  $C_4H_2Ge_2N^+$ , their point group symmetries and spectroscopic states. Relative energies are shown in kcal/mol at DLPNO-CCSD(T)/CSB//PBE0-D3/def2-TZVP (**in bold**) and PBE0-D3/def2-TZVP (in parentheses) levels, including zero-point energy (ZPE) corrections.

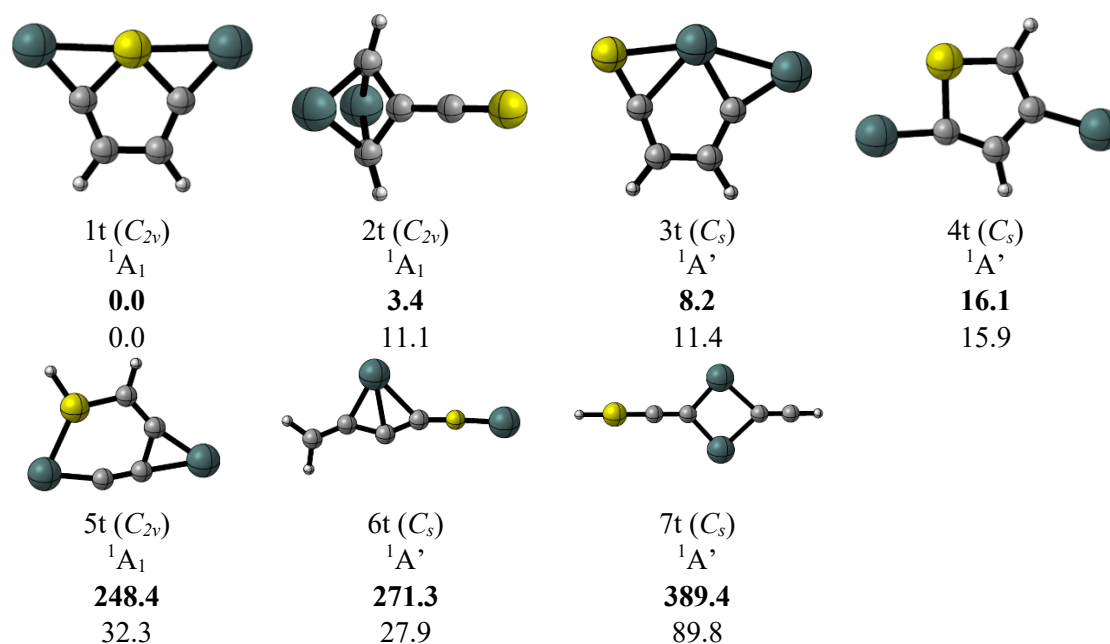

**Figures S18.** Global minimum and low-lying isomers of  $C_4H_2Ge_2P^+$ , their point group symmetries and spectroscopic states. Relative energies are shown in kcal/mol at DLPNO-CCSD(T)/CSB//PBE0-D3/def2-TZVP (**in bold**) and PBE0-D3/def2-TZVP (in parentheses) levels, including zero-point energy (ZPE) corrections.

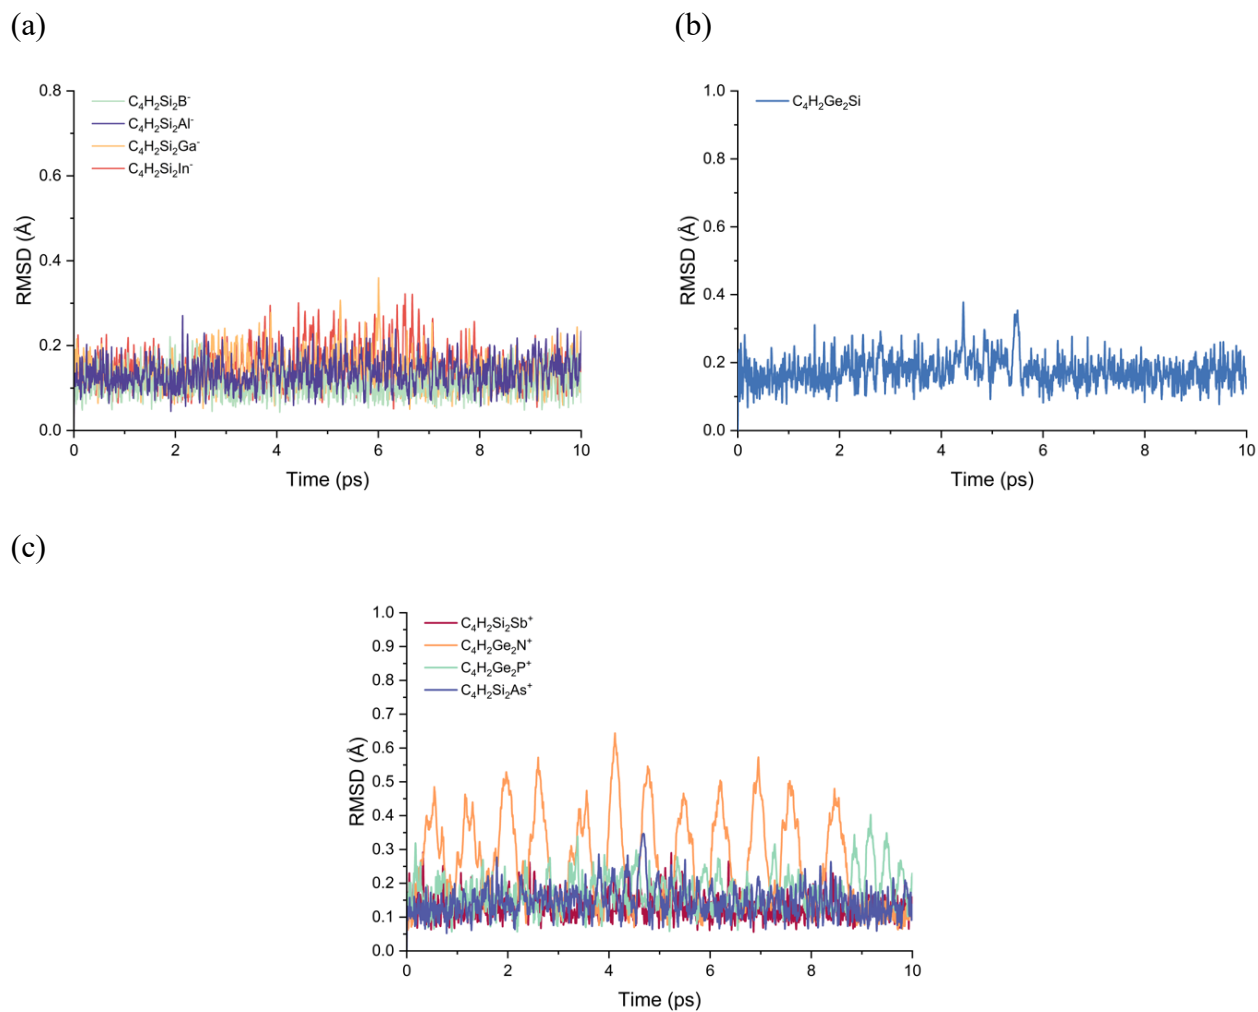

**Figure S19.** Born-Oppenheimer molecular dynamics (BO-MD) conducted at 450 K of minimum global of (a)  $C_4H_3ETr_2^-$  (E = B/Al/Ga/In/Tl), (b)  $C_4H_3Ge_2Si$  and (c)  $C_4H_2ETr_2^+$  (E=As/Sb/Bi),  $C_4H_2ETr_2^+$  (E=N/P).

**Table S1.** HOMO-LUMO energy gaps, singlet-triplet energy differences, smallest vibrational frequencies and  $T_1$ -diagnostics for the global minimum of  $C_4H_3ETr_2^-$  ( $E = B/Al/Ga/In/Tl$ ),  $C_4H_3Ge_2Si$ ,  $C_4H_2ETr_2^+$  ( $E=As/Sb/Bi$ ),  $C_4H_2ETr_2^+$  ( $E=N/P$ ).

| System           | $\Delta E_{H-L}$ (eV) | $\Delta E_{S-T}$ (kcal/mol) | $\nu_{min}$ ( $cm^{-1}$ ) | $T_1$ Diagnostic |
|------------------|-----------------------|-----------------------------|---------------------------|------------------|
| $C_4H_2Si_2B^-$  | 3.7                   | 42.8                        | 206                       | 0.015            |
| $C_4H_2Si_2Al^-$ | 2.8                   | 22.9                        | 121                       | 0.017            |
| $C_4H_2Si_2Ga^-$ | 2.8                   | 23.8                        | 103                       | 0.015            |
| $C_4H_2Si_2In^-$ | 2.9                   | 25.5                        | 85                        | 0.016            |
| $C_4H_2Si_2Tl^-$ | 3.3                   | 27.6                        | 75                        | 0.016            |
| $C_4H_2Ge_2Si$   | 4.1                   | 46.3                        | 98                        | 0.014            |
| $C_4H_2Ge_2N^+$  | 4.5                   | 72.1                        | 102                       | 0.012            |
| $C_4H_2Ge_2P^+$  | 4.6                   | 63.9                        | 78                        | 0.013            |
| $C_4H_2Si_2As^+$ | 4.8                   | 63.3                        | 82                        | 0.012            |
| $C_4H_2Si_2Sb^+$ | 4.2                   | 36.3                        | 78                        | 0.013            |
| $C_4H_2Si_2Bi^+$ | 3.8                   | 34.7                        | 78                        | 0.013            |

**Table S2.** Natural charges ( $q$ , in  $|e|$ ), Wiberg bond indices (WBI) and bond distances ( $r$ , in Å) of minimum global (a)  $C_4H_3ETr_2^-$  ( $E = B/Al/Ga/In/Tl$ ), (b)  $C_4H_3Ge_2Si$ , and (c)  $C_4H_2ETr_2^+$  ( $E=As/Sb/Bi$ ,  $Tr=Si$ ),  $C_4H_2ETr_2^+$  ( $E=N/P$ ,  $Tr=Ge$ ) at PBE0-D3/def2-TZVP level.

| (a)                                                                                | $q$  |       |       |       |       |      |
|------------------------------------------------------------------------------------|------|-------|-------|-------|-------|------|
|                                                                                    | E    | Tr    | C1    | C2    | H     |      |
| 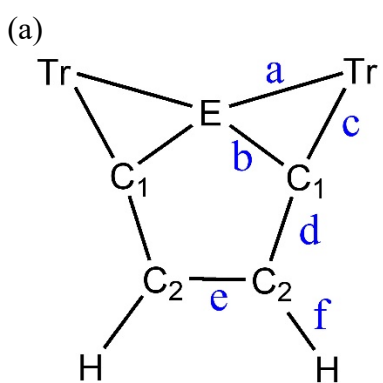 | B    | +0.57 | -0.80 | -0.26 | +0.19 |      |
|                                                                                    | Al   | +0.38 | -1.04 | -0.28 | +0.18 |      |
|                                                                                    | Ga   | +0.43 | -0.99 | -0.29 | +0.18 |      |
|                                                                                    | In   | +0.43 | -0.95 | -0.31 | +0.18 |      |
|                                                                                    | Tl   | +0.39 | -0.90 | -0.32 | +0.19 |      |
| $r$                                                                                |      |       |       |       |       |      |
| $WBI$                                                                              |      |       |       |       |       |      |
|                                                                                    | a    | b     | c     | d     | e     | f    |
|                                                                                    | 1.99 | 1.58  | 1.73  | 1.42  | 1.38  | 1.09 |
|                                                                                    | 0.78 | 1.02  | 1.23  | 1.26  | 1.57  | 0.91 |
|                                                                                    | 2.45 | 2.08  | 1.72  | 1.42  | 1.37  | 1.09 |
|                                                                                    | 0.78 | 0.53  | 1.54  | 1.26  | 1.59  | 0.90 |
|                                                                                    | 2.44 | 2.13  | 1.72  | 1.41  | 1.37  | 1.09 |
|                                                                                    | 0.74 | 0.55  | 1.51  | 1.28  | 1.57  | 0.89 |
|                                                                                    | 2.73 | 2.56  | 1.69  | 1.40  | 1.37  | 1.09 |
|                                                                                    | 0.49 | 0.41  | 1.76  | 1.30  | 1.55  | 0.89 |
|                                                                                    | 2.88 | 2.77  | 1.68  | 1.39  | 1.37  | 1.09 |
|                                                                                    | 0.37 | 0.33  | 1.89  | 1.32  | 1.54  | 0.89 |

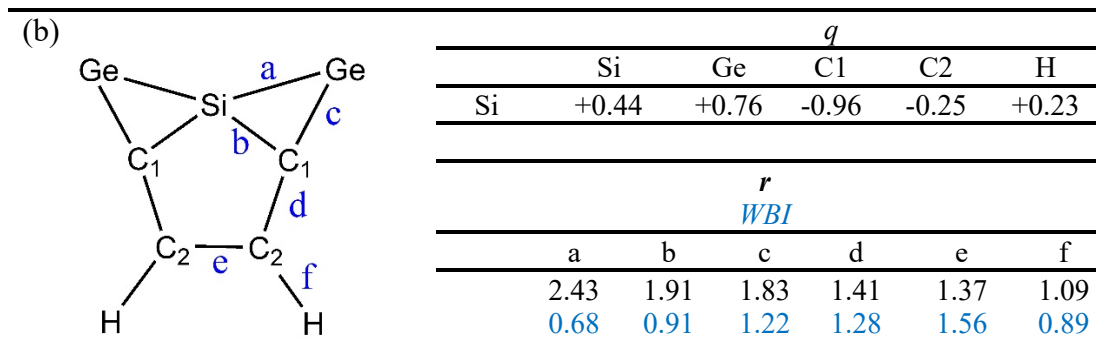

(c)

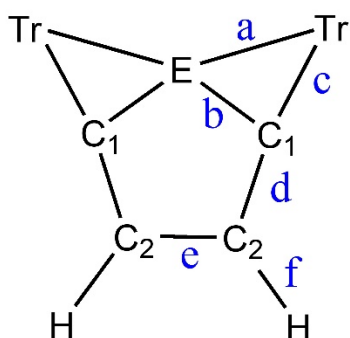

| <i>q</i> |       |       |       |       |       |
|----------|-------|-------|-------|-------|-------|
|          | E     | Tr    | C1    | C2    | H     |
| As       | +0.44 | +1.13 | -0.92 | -0.20 | +0.27 |
| Sb       | +0.69 | +1.07 | -0.95 | -0.22 | +0.27 |
| Bi       | +0.73 | +1.02 | -0.92 | -0.24 | +0.27 |

  

|   | Tr    | Si    | C1    | C2    | H     |
|---|-------|-------|-------|-------|-------|
| N | -0.77 | +1.26 | -0.44 | -0.21 | +0.27 |
| P | +0.34 | +1.17 | -0.90 | -0.20 | +0.27 |

| <i>r</i>   |      |      |      |      |      |      |
|------------|------|------|------|------|------|------|
| <i>WBI</i> |      |      |      |      |      |      |
|            | a    | b    | c    | d    | e    | f    |
|            | 2.47 | 1.98 | 1.75 | 1.40 | 1.37 | 1.09 |
|            | 0.46 | 1.03 | 1.03 | 1.34 | 1.51 | 0.88 |
|            | 2.66 | 2.22 | 1.73 | 1.39 | 1.37 | 1.09 |
|            | 0.47 | 0.92 | 1.15 | 1.36 | 1.49 | 0.87 |
|            | 2.75 | 2.36 | 1.72 | 1.39 | 1.37 | 1.09 |
|            | 0.47 | 0.85 | 1.23 | 1.38 | 1.47 | 0.87 |
|            | 2.12 | 1.40 | 1.86 | 1.40 | 1.38 | 1.08 |
|            | 0.25 | 1.20 | 0.83 | 1.34 | 1.53 | 0.90 |
|            | 2.47 | 1.81 | 1.86 | 1.40 | 1.37 | 1.08 |
|            | 0.41 | 1.16 | 0.94 | 1.32 | 1.52 | 0.88 |

<sup>[a]</sup>The sums of Pyukkö's single-bond radii for the B-Si, Al-Si, Ga-Si, In-Si, Tl-Si, Si-Ge, As-Si, Sb-Si, Bi-Si, N-Ge and P-Ge bond are 2.01, 2.42, 2.40, 2.58, 2.60, 2.37, 2.42, 2.61, 2.72, 1.92, and 2.32 Å.



|        | Si-Lone Pairs                                                                     |                                                                                   | $\sigma$ -bonds                                                                   |                                                                                    |                                                                                     |
|--------|-----------------------------------------------------------------------------------|-----------------------------------------------------------------------------------|-----------------------------------------------------------------------------------|------------------------------------------------------------------------------------|-------------------------------------------------------------------------------------|
|        | 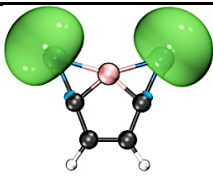 |  |  |  |  |
|        | 2 x 1c-2e                                                                         | 3 x 2c-2e C-C                                                                     | 2 x 2c-2e C-H                                                                     | 2 x 2c-2e C-E                                                                      | 2 x 2c-2e C-Si or Ge                                                                |
| E = B  | 1.94  e                                                                           | 1.99  e                                                                           | 1.98  e                                                                           | 1.82  e                                                                            | 1.96  e                                                                             |
| E = Al | 1.88  e                                                                           | 1.99  e                                                                           | 1.97  e                                                                           | 1.63  e                                                                            | 1.97  e                                                                             |
| E = Ga | 1.90  e                                                                           | 1.99  e                                                                           | 1.97  e                                                                           | 1.61  e                                                                            | 1.97  e                                                                             |

  

|        | $\sigma$ -bonds                                                                   | $\pi$ -bonds                                                                      |                                                                                    |                                                                                     |
|--------|-----------------------------------------------------------------------------------|-----------------------------------------------------------------------------------|------------------------------------------------------------------------------------|-------------------------------------------------------------------------------------|
|        |  |  |  |  |
|        | 1 x 3c-2e                                                                         | 3 x 7c-2e                                                                         |                                                                                    |                                                                                     |
| E = B  | 1.94  e                                                                           | 2.00  e                                                                           |                                                                                    |                                                                                     |
| E = Al | 1.92  e                                                                           | 2.00  e                                                                           |                                                                                    |                                                                                     |
| E = Ga | 1.91  e                                                                           | 2.00  e                                                                           |                                                                                    |                                                                                     |

**Figure S20.** The adaptive natural density partitioning (AdNDP) bonding pattern of minimum global of  $C_4H_3ETr_2^-$  (E = B/Al/Ga) at the PBE0-D3/def2-TZVP level.

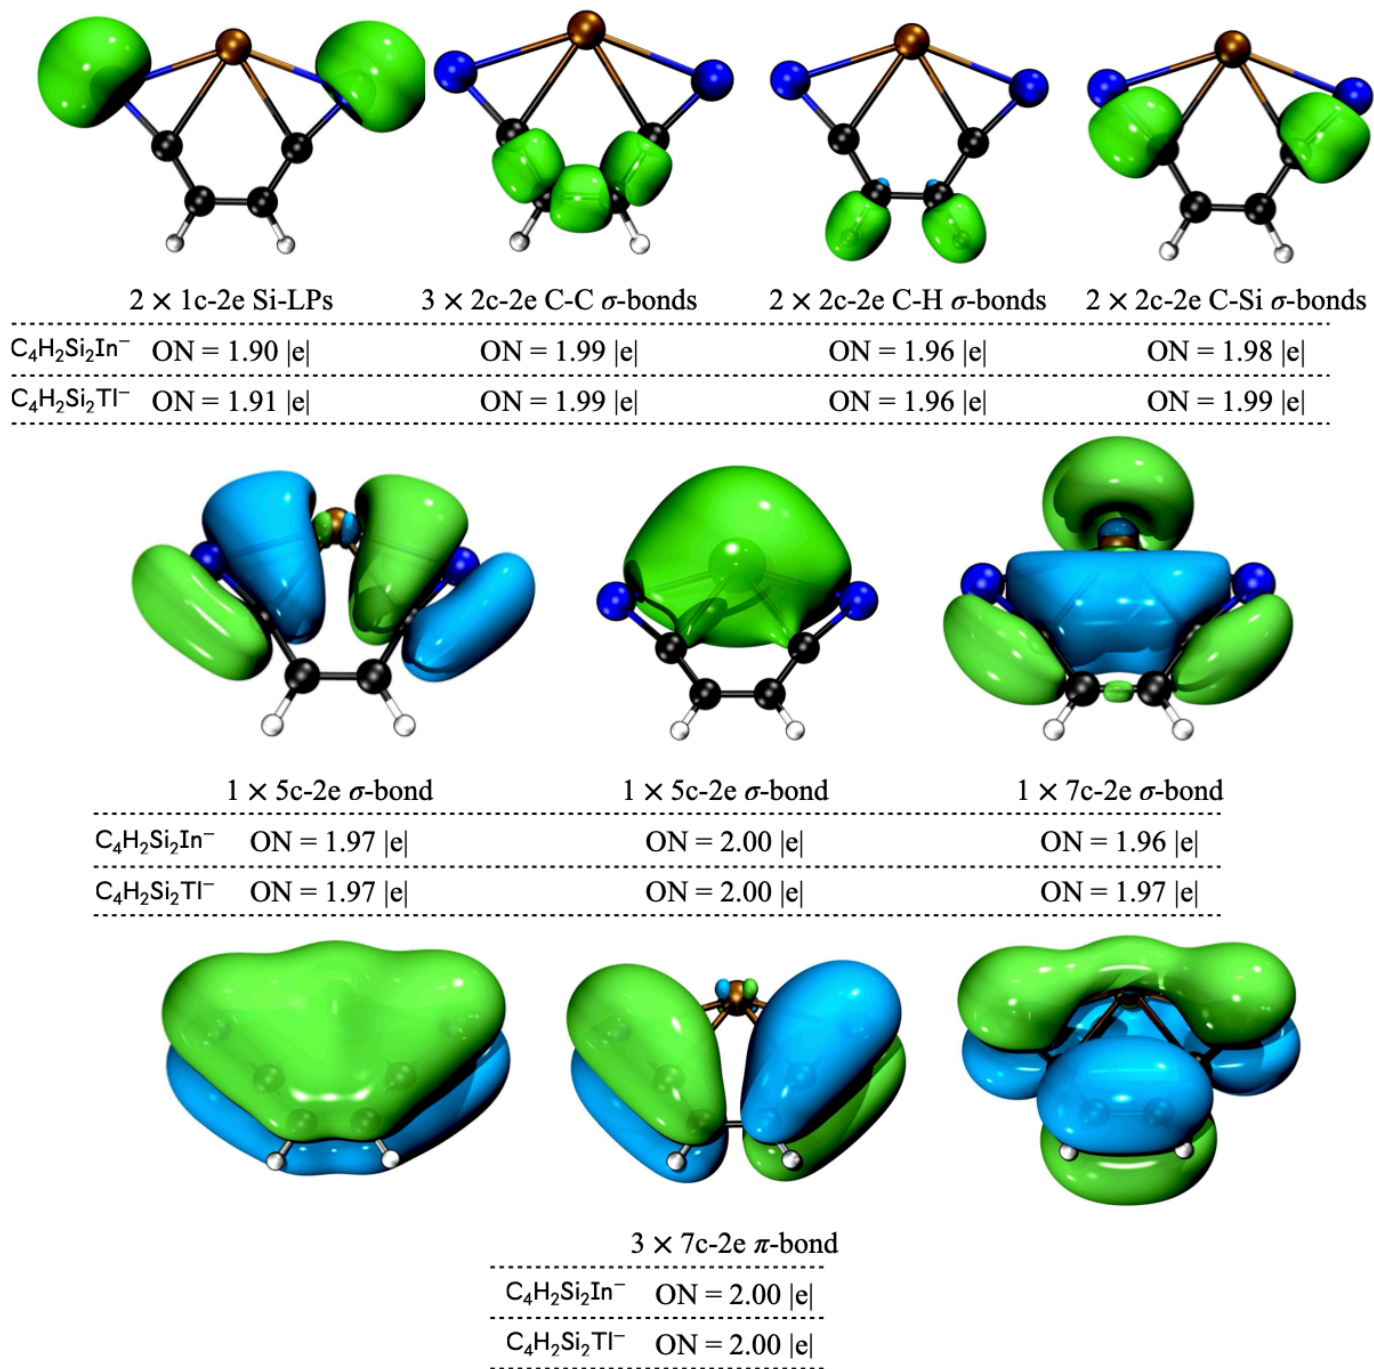

**Figure S21.** The adaptive natural density partitioning (AdNDP) bonding pattern of minimum global of  $C_4H_2Si_2In^-$  and  $C_4H_2Si_2Tl^-$ .

**Table S3.** QTAIM atomic charges for  $C_4H_2ETr_2^n$  (E = B-Tl with Tr = Si and  $n = -1$ ; E = Si with Tr = Ge and  $n = 0$ ; E = N-P with Tr = Ge and  $n = +1$ ; E = As-Bi with Tr = Si and  $n = +1$ ) at PBE0-D3/def2-TZVP level.

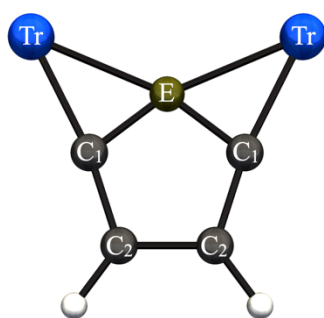

|    | B     | Al    | Ga    | In    | Tl    | Si    | N     | P     | As    | Sb    | Bi    |
|----|-------|-------|-------|-------|-------|-------|-------|-------|-------|-------|-------|
| E  | 0.49  | 1.23  | 0.29  | 0.21  | 0.16  | 1.04  | -1.29 | 0.78  | 0.38  | 0.66  | 0.66  |
| Tr | 1.00  | 0.72  | 0.85  | 0.85  | 0.83  | 0.71  | 1.16  | 1.06  | 1.36  | 1.30  | 1.26  |
| C1 | -1.69 | -1.81 | -1.47 | -1.44 | -1.40 | -1.29 | -0.16 | -1.11 | -1.23 | -1.30 | -1.27 |
| C2 | 0.01  | 0.01  | 0.01  | 0.01  | 0.01  | 0.01  | 0.02  | 0.04  | 0.05  | 0.05  | 0.05  |
| H  | 0.00  | 0.00  | 0.00  | 0.00  | 0.00  | 0.01  | 0.13  | 0.12  | 0.13  | 0.12  | 0.12  |

**Table S4.** Energy components of IQA and delocalization indices ( $\delta$ ) between atom pairs for  $C_4H_2ETr_2^n$  (E = B-Tl with Tr = Si and  $n = -1$ ; E = Si with Tr = Ge and  $n = 0$ ; E = N-P with Tr = Ge and  $n = +1$ ; E = As-Bi with Tr = Si and  $n = +1$ ).  $\Delta E_{IQA}$  is the total integration error in IQA energies,  $V_{IQA}^{int}$ ,  $V_C^{int}$ , and  $V_{XC}^{int}$  are interatomic IQA interaction energy, Coulomb energy component, and exchange-correlation energy component of the interaction energy, respectively, in kcal/mol.

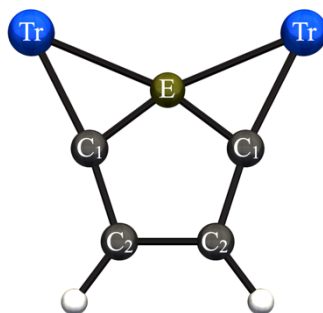

|                          | B      | Al     | Ga     | In     | Tl     | Si     | N      | P      | As     | Sb     | Bi     |
|--------------------------|--------|--------|--------|--------|--------|--------|--------|--------|--------|--------|--------|
| $\Delta E_{IQA}$         | 0.0    | 0.0    | 0.0    | 0.0    | 0.0    | 0.0    | 0.0    | 0.0    | 0.0    | 0.0    | 0.0    |
| $V_{IQA}^{int}(E-Tr)$    | 94.6   | 175.2  | 41.3   | 27.9   | 10.9   | 116.1  | -343.0 | 114.6  | 66.6   | 113.3  | 98.5   |
| $V_C^{int}(E-Tr)$        | 154.7  | 217.1  | 97.2   | 69.4   | 45.7   | 174.4  | -287.4 | 161.8  | 112.4  | 155.6  | 139.7  |
| $V_{XC}^{int}(E-Tr)$     | -60.1  | -41.9  | -55.9  | -41.5  | -34.8  | -58.3  | -55.6  | -47.1  | -45.8  | -42.4  | -41.2  |
| $V_{IQA}^{int}(E-C_1)$   | -481.4 | -584.8 | -244.2 | -163.7 | -115.2 | -521.5 | -290.7 | -461.8 | -285.9 | -307.8 | -266.1 |
| $V_C^{int}(E-C_1)$       | -331.3 | -518.3 | -144.8 | -99.2  | -62.9  | -411.8 | -72.0  | -290.0 | -122.8 | -176.6 | -150.8 |
| $V_{XC}^{int}(E-C_1)$    | -150.1 | -66.5  | -99.4  | -64.5  | -52.3  | -109.6 | -218.8 | -170.9 | -163.1 | -131.2 | -115.4 |
| $V_{IQA}^{int}(C_1-Tr)$  | -834.3 | -762.8 | -713.8 | -723.0 | -715.4 | -477.6 | -209.0 | -473.4 | -707.3 | -727.9 | -713.1 |
| $V_C^{int}(C_1-Tr)$      | -682.9 | -577.6 | -549.8 | -544.1 | -529.6 | -293.0 | -77.2  | -318.0 | -581.3 | -590.7 | -571.5 |
| $V_{XC}^{int}(C_1-Tr)$   | -151.4 | -185.2 | -164.0 | -178.9 | -185.8 | -184.5 | -131.8 | -155.4 | -126.0 | -137.2 | -141.6 |
| $V_{IQA}^{int}(C_1-C_2)$ | -222.2 | -225.3 | -226.7 | -229.7 | -230.5 | -231.0 | -213.5 | -239.9 | -246.4 | -248.4 | -249.9 |
| $V_C^{int}(C_1-C_2)$     | 19.9   | 18.6   | 20.0   | 21.3   | 23.7   | 12.7   | 28.9   | 6.3    | 4.6    | 5.5    | 8.0    |
| $V_{XC}^{int}(C_1-C_2)$  | -242.1 | -243.9 | -246.7 | -251.0 | -254.1 | -243.7 | -242.4 | -246.2 | -251.0 | -253.9 | -257.9 |
| $\delta(E-Tr)$           | 0.5    | 0.5    | 0.6    | 0.4    | 0.4    | 0.6    | 0.5    | 0.5    | 0.5    | 0.5    | 0.5    |
| $\delta(E-C_1)$          | 0.9    | 0.5    | 0.8    | 0.6    | 0.6    | 0.8    | 1.2    | 1.2    | 1.2    | 1.1    | 1.0    |
| $\delta(C_1-Tr)$         | 1.2    | 1.5    | 1.3    | 1.4    | 1.5    | 1.4    | 0.9    | 1.1    | 0.9    | 1.0    | 1.1    |
| $\delta(C_1-C_2)$        | 1.3    | 1.3    | 1.3    | 1.3    | 1.4    | 1.3    | 1.3    | 1.3    | 1.3    | 1.4    | 1.4    |



$C_4H_2Si_2B^-$ -Total

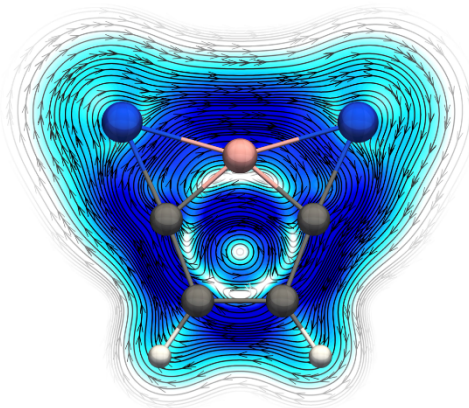

8.0 nA/T

$C_4H_2Si_2B^-$ - $\sigma$

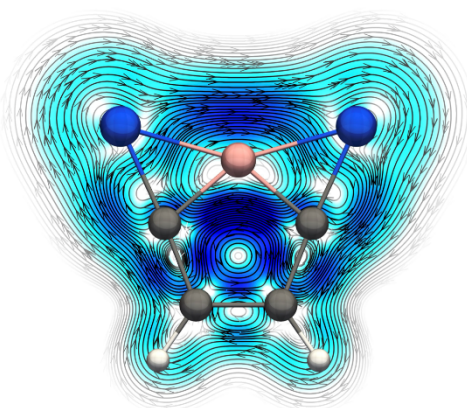

0.0 nA/T

$C_4H_2Si_2B^-$ - $\pi$

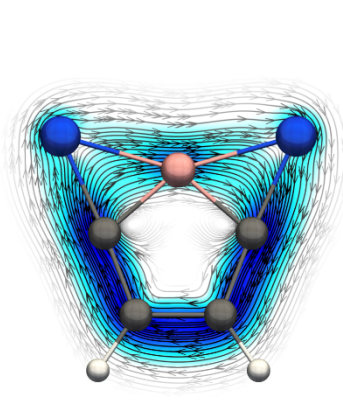

8.0 nA/T

$C_4H_2Si_2Al^-$ -Total

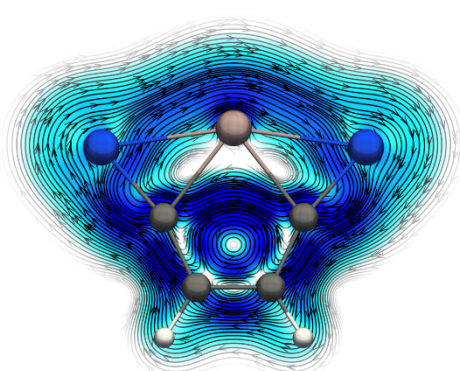

5.2 nA/T

$C_4H_2Si_2Al^-$ - $\sigma$

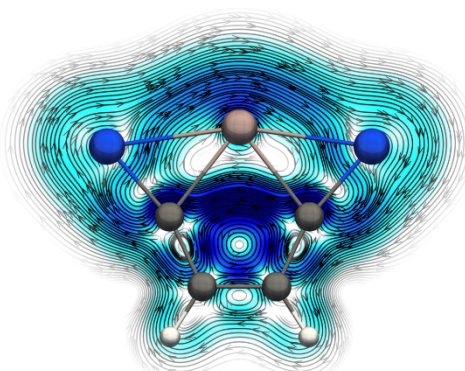

0.0 nA/T

$C_4H_2Si_2Al^-$ - $\pi$

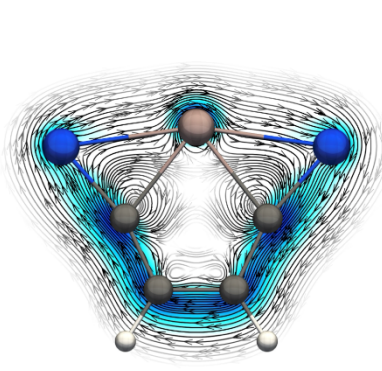

5.2 nA/T

$C_4H_2Si_2Ga^-$ -Total

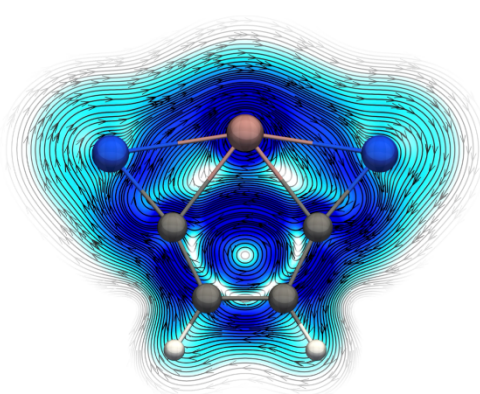

6.2 nA/T

$C_4H_2Si_2Ga^-$ - $\sigma$

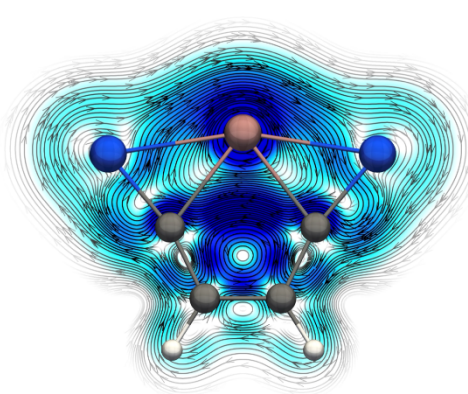

0.2 nA/T

$C_4H_2Si_2Ga^-$ - $\pi$

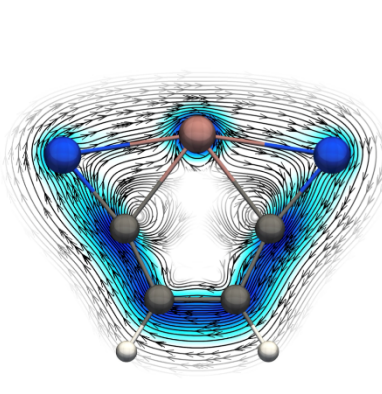

6.0 nA/T

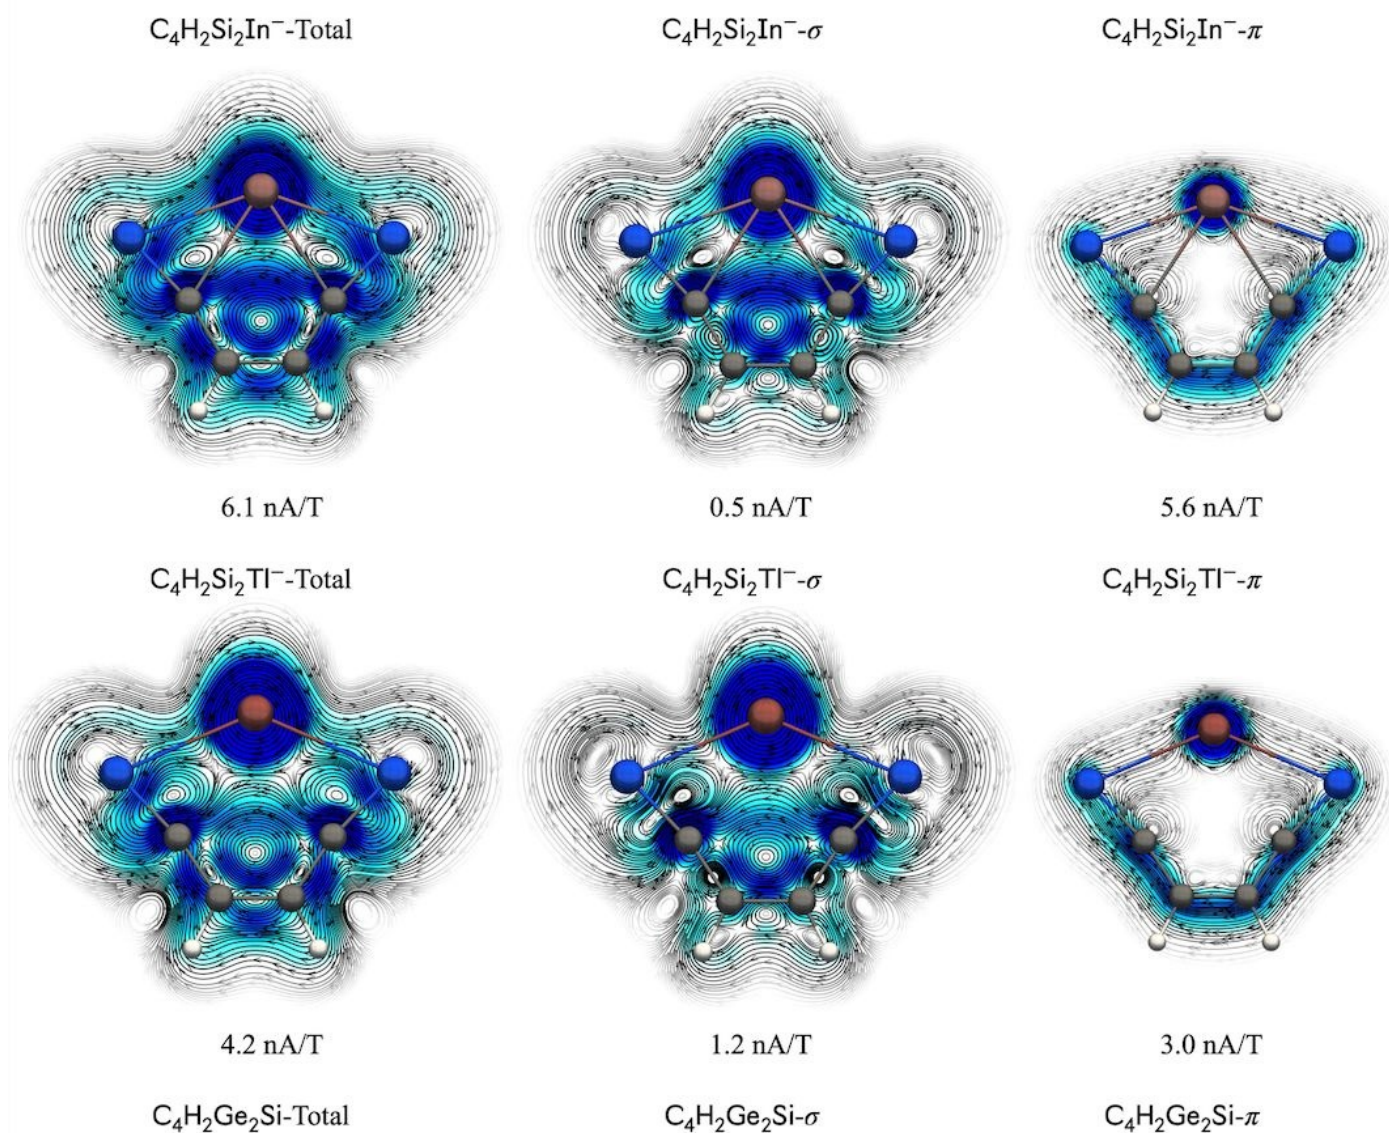

**Figure S22.** Vector maps of current density located 0.5 Å above the molecular plane for  $C_4H_2Si_2E^-$  ( $E = B, Al, Ga, In$  and  $Tl$ ). Corresponding current strengths in nA/T are also provided at the PBE0-D3/def2-TZVP level.



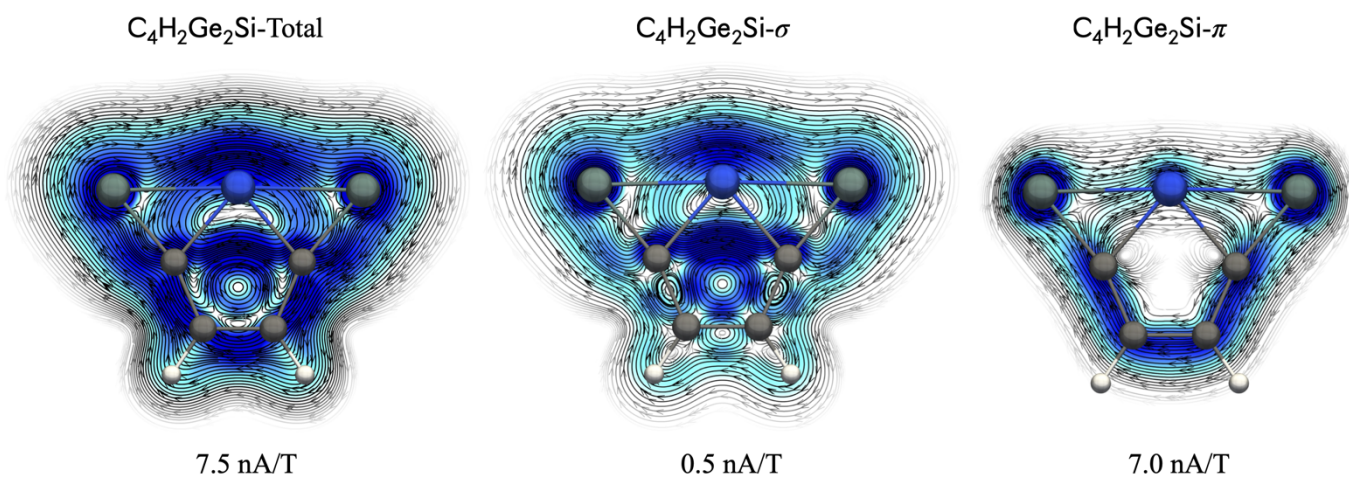

**Figure S23.** Vector maps of current density located 0.5 Å above the molecular plane for  $C_4H_2Ge_2Si$ . Corresponding current strengths in nA/T are also provided at the PBE0-D3/def2-TZVP level.

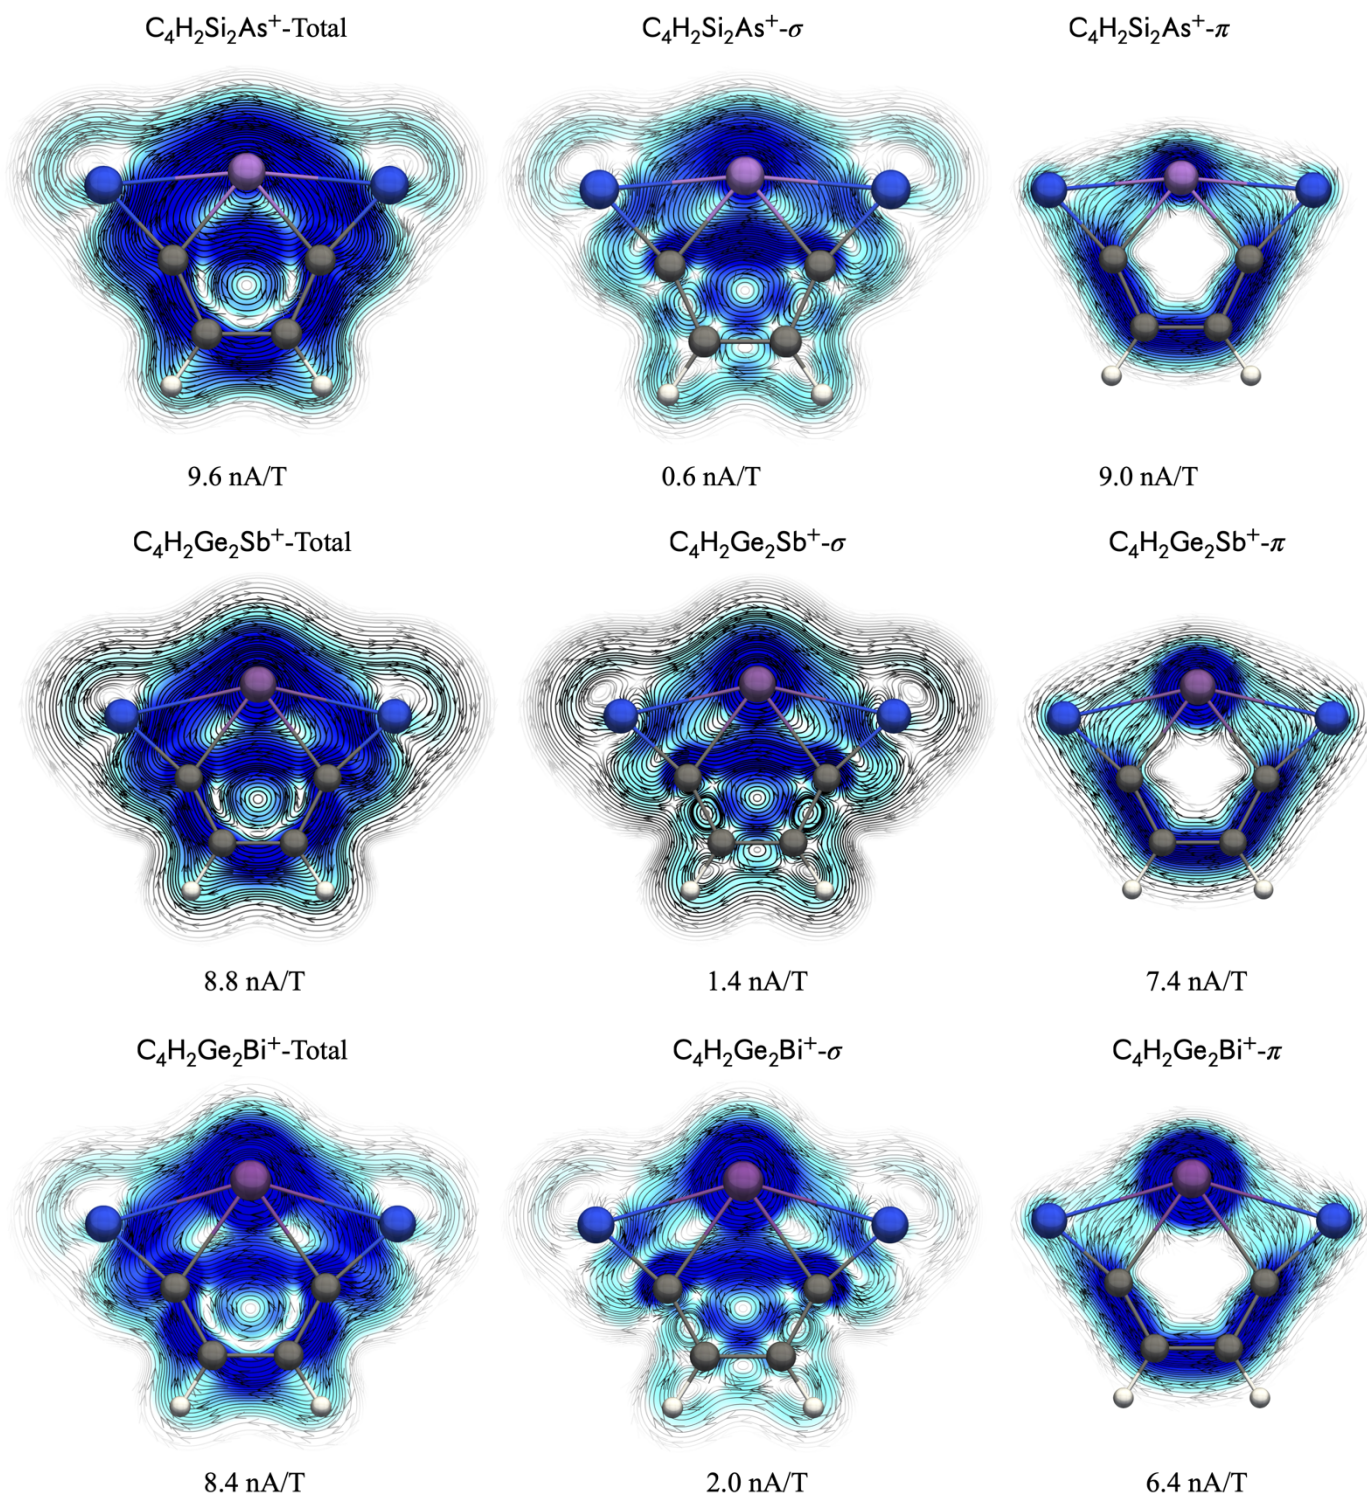

**Figure S24.** Vector maps of current density located 0.5 Å above the molecular plane for  $C_4H_2Si_2E^+$  ( $E = As, Sb$  and  $Bi$ ). Corresponding current strengths in nA/T are also provided at the PBE0-D3/def2-TZVP level



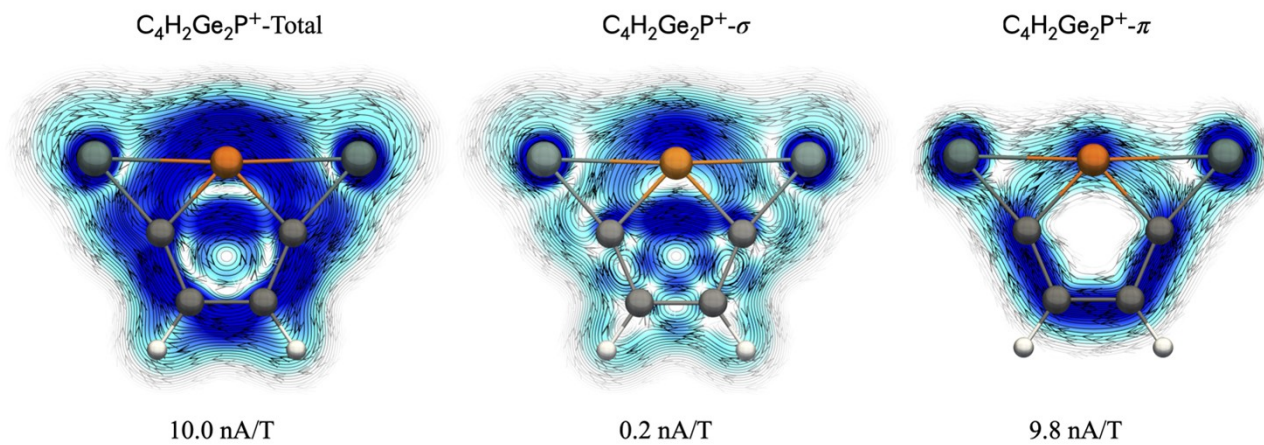

**Figure S25.** Vector maps of current density located  $0.5 \text{ \AA}$  above the molecular plane for  $C_4H_2Ge_2P^+$ . Corresponding current strengths in nA/T are also provided at the PBE0-D3/def2-TZVP level.

# Cartesian Coordinates

Cartesian Coordinates of  $C_4H_3Tr_2E^-$  ( $E = B/Al/Ga/In/Tl$ ),  $C_4H_3Ge_2Si$ ,  $C_4H_3Tr_2E^+$  ( $E=As/Sb/Bi$ ),  $C_4H_3Tr_2E^+$  ( $E=N/P$ ) cluster calculated at the PBE0-D3/def2-TZVP level.

|           |              |              |              |    |              |              |              |
|-----------|--------------|--------------|--------------|----|--------------|--------------|--------------|
| <b>1a</b> |              |              | <b>2a</b>    |    |              |              |              |
| C         | 0.00000000   | 1.197523000  | -0.491248000 | C  | -0.791906000 | -1.949674000 | 0.000000000  |
| H         | 0.00000000   | -1.304556000 | -2.716337000 | H  | 1.252489000  | -2.768177000 | 0.000000000  |
| C         | 0.00000000   | -1.197523000 | -0.491248000 | C  | 0.585382000  | -1.906039000 | 0.000000000  |
| C         | 0.00000000   | 0.688410000  | -1.816278000 | C  | 0.000000000  | 0.459305000  | 0.000000000  |
| B         | 0.00000000   | 0.000000000  | 0.536088000  | B  | -1.312011000 | -0.521328000 | 0.000000000  |
| Si        | 0.00000000   | 1.914360000  | 1.087234000  | C  | 1.050699000  | -0.572393000 | 0.000000000  |
| H         | 0.00000000   | 1.304556000  | -2.716337000 | Si | -1.690967000 | 1.289134000  | 0.000000000  |
| C         | 0.00000000   | -0.688410000 | -1.816278000 | H  | -1.343593000 | -2.887547000 | 0.000000000  |
| Si        | 0.00000000   | -1.914360000 | 1.087234000  | Si | 1.804260000  | 1.001949000  | 0.000000000  |
| <b>3a</b> |              |              | <b>4a</b>    |    |              |              |              |
| Si        | -1.884517000 | -1.215252000 | 0.000000000  | H  | 3.716929000  | -0.002292000 | 1.299740000  |
| Si        | 1.704925000  | 1.927989000  | 0.000000000  | B  | -3.210359000 | -0.002478000 | 0.626825000  |
| H         | 0.136757000  | -2.966137000 | 0.000000000  | C  | 3.326067000  | -0.001320000 | 0.287739000  |
| C         | -1.406627000 | 0.526387000  | 0.000000000  | Si | -0.623964000 | 1.322473000  | -0.229457000 |
| C         | -0.101274000 | -1.905834000 | 0.000000000  | C  | 2.026540000  | -0.000714000 | 0.054145000  |
| B         | 0.000000000  | 0.963880000  | 0.000000000  | C  | -1.811800000 | 0.001533000  | 0.221722000  |
| C         | 1.437245000  | 0.168134000  | 0.000000000  | H  | 4.040097000  | -0.000883000 | -0.529035000 |
| C         | 0.833606000  | -0.973188000 | 0.000000000  | C  | 0.758038000  | -0.000060000 | -0.141715000 |
| H         | -2.200177000 | 1.275427000  | 0.000000000  | Si | -0.625915000 | -1.321121000 | -0.230270000 |
| <b>1b</b> |              |              | <b>2b</b>    |    |              |              |              |
| C         | 0.00000000   | 1.283308000  | -0.559388000 | Si | 2.168525000  | -1.159366000 | 0.000000000  |
| H         | 0.00000000   | -1.271648000 | -2.763005000 | Si | -2.386894000 | 1.356108000  | 0.000000000  |
| C         | 0.00000000   | -1.283308000 | -0.559388000 | H  | 0.298985000  | -3.032965000 | 0.000000000  |
| C         | 0.00000000   | 0.682720000  | -1.840459000 | C  | 1.771872000  | 0.592745000  | 0.000000000  |
| Al        | 0.00000000   | 0.000000000  | 1.078422000  | C  | 0.414458000  | -1.948965000 | 0.000000000  |
| Si        | 0.00000000   | 2.425356000  | 0.725167000  | Al | 0.000000000  | 1.182174000  | 0.000000000  |
| H         | 0.00000000   | 1.271648000  | -2.763005000 | C  | -1.507871000 | -0.203523000 | 0.000000000  |
| C         | 0.00000000   | -0.682720000 | -1.840459000 | C  | -0.655355000 | -1.168301000 | 0.000000000  |
| Si        | 0.00000000   | -2.425356000 | 0.725167000  | H  | 2.619555000  | 1.278581000  | 0.000000000  |
| <b>3b</b> |              |              | <b>4b</b>    |    |              |              |              |
| C         | -0.141038000 | -2.281566000 | 0.000000000  | H  | 0.968576000  | 4.200073000  | 0.000000000  |
| H         | -2.294817000 | -2.007471000 | 0.000000000  | Al | 1.061894000  | -3.038857000 | 0.000000000  |
| C         | -1.299828000 | -1.549851000 | 0.000000000  | C  | -0.033990000 | 3.784051000  | 0.000000000  |
| C         | 0.000000000  | 0.644261000  | 0.000000000  | Si | -0.401535000 | -0.212069000 | 1.296976000  |
| Al        | 1.370999000  | -1.061379000 | 0.000000000  | C  | -0.237764000 | 2.476883000  | 0.000000000  |
| C         | -1.205931000 | -0.135402000 | 0.000000000  | C  | 0.229239000  | -1.339406000 | 0.000000000  |
| Si        | 1.723290000  | 1.237947000  | 0.000000000  | H  | -0.865918000 | 4.481069000  | 0.000000000  |
| H         | -0.211190000 | -3.369373000 | 0.000000000  | C  | -0.401535000 | 1.205462000  | 0.000000000  |
| Si        | -1.683018000 | 1.555634000  | 0.000000000  | Si | -0.401535000 | -0.212069000 | -1.296976000 |
| <b>1c</b> |              |              | <b>2c</b>    |    |              |              |              |
| C         | 0.00000000   | 1.299447000  | -0.818277000 | C  | 1.106635000  | -1.755200000 | 0.000000000  |
| H         | 0.00000000   | -1.267121000 | -3.012147000 | H  | 3.037742000  | -0.778363000 | 0.000000000  |
| C         | 0.00000000   | -1.299447000 | -0.818277000 | C  | 1.947867000  | -0.673733000 | 0.000000000  |
| C         | 0.00000000   | 0.683292000  | -2.085738000 | C  | 0.000000000  | 0.966319000  | 0.000000000  |
| Ga        | 0.00000000   | 0.000000000  | 0.871391000  | Ga | -0.760358000 | -1.191974000 | 0.000000000  |
| Si        | 0.00000000   | 2.405388000  | 0.494977000  | C  | 1.387328000  | 0.626432000  | 0.000000000  |
| H         | 0.00000000   | 1.267121000  | -3.012147000 | Si | -1.817723000 | 0.865561000  | 0.000000000  |
| C         | 0.00000000   | -0.683292000 | -2.085738000 | H  | 1.528787000  | -2.759850000 | 0.000000000  |
| Si        | 0.00000000   | -2.405388000 | 0.494977000  | Si | 1.271550000  | 2.384902000  | 0.000000000  |
| <b>3c</b> |              |              | <b>4c</b>    |    |              |              |              |
| Si        | 2.162267000  | -1.438198000 | 0.000000000  | H  | -2.829122000 | -4.029188000 | 0.000000000  |
| Si        | -2.367670000 | 1.050390000  | 0.000000000  | Ga | 0.348752000  | 2.539690000  | 0.000000000  |
| H         | 0.320559000  | -3.324370000 | 0.000000000  | C  | -1.745726000 | -4.098199000 | 0.000000000  |
| C         | 1.744215000  | 0.310189000  | 0.000000000  | Si | 0.348752000  | -0.675360000 | 1.298794000  |
| C         | 0.423561000  | -2.239248000 | 0.000000000  | C  | -0.985740000 | -3.015100000 | 0.000000000  |
| Ga        | 0.000000000  | 1.007848000  | 0.000000000  | C  | 0.268898000  | 0.609972000  | 0.000000000  |
| C         | -1.516502000 | -0.519860000 | 0.000000000  | H  | -1.307511000 | -5.091237000 | 0.000000000  |
| C         | -0.654670000 | -1.468898000 | 0.000000000  | C  | -0.277387000 | -1.946653000 | 0.000000000  |
| H         | 2.575448000  | 1.017299000  | 0.000000000  | Si | 0.348752000  | -0.675360000 | -1.298794000 |
| <b>1d</b> |              |              | <b>2d</b>    |    |              |              |              |

|    |            |              |              |
|----|------------|--------------|--------------|
| C  | 0.00000000 | 1.407539000  | -1.164102000 |
| H  | 0.00000000 | -1.224486000 | -3.315467000 |
| C  | 0.00000000 | -1.407539000 | -1.164102000 |
| C  | 0.00000000 | 0.682358000  | -2.363799000 |
| In | 0.00000000 | 0.000000000  | 0.967841000  |
| Si | 0.00000000 | 2.571387000  | 0.055056000  |
| H  | 0.00000000 | 1.224486000  | -3.315467000 |
| C  | 0.00000000 | -0.682358000 | -2.363799000 |
| Si | 0.00000000 | -2.571387000 | 0.055056000  |

|    |              |              |             |
|----|--------------|--------------|-------------|
| C  | 1.614471000  | 1.279072000  | 0.000000000 |
| H  | 3.290012000  | -0.077319000 | 0.000000000 |
| C  | 2.200700000  | 0.044747000  | 0.000000000 |
| C  | 0.000000000  | -1.251805000 | 0.000000000 |
| In | -0.551452000 | 1.208011000  | 0.000000000 |
| C  | 1.413534000  | -1.137345000 | 0.000000000 |
| Si | -1.766882000 | -1.056887000 | 0.000000000 |
| H  | 2.273581000  | 2.150138000  | 0.000000000 |
| Si | 1.058692000  | -2.862640000 | 0.000000000 |

### 3d

|    |              |              |              |
|----|--------------|--------------|--------------|
| H  | -2.880496000 | -4.575048000 | 0.000000000  |
| In | 0.288241000  | 2.197972000  | 0.000000000  |
| C  | -1.796794000 | -4.641929000 | 0.000000000  |
| Si | 0.288241000  | -1.207866000 | 1.296419000  |
| C  | -1.038260000 | -3.557249000 | 0.000000000  |
| C  | 0.173544000  | 0.075421000  | 0.000000000  |
| H  | -1.357489000 | -5.634651000 | 0.000000000  |
| C  | -0.331254000 | -2.488019000 | 0.000000000  |
| Si | 0.288241000  | -1.207866000 | -1.296419000 |

### 4d

|    |              |              |             |
|----|--------------|--------------|-------------|
| Si | 2.230858000  | -1.667319000 | 0.000000000 |
| Si | -2.538829000 | 0.624568000  | 0.000000000 |
| H  | 0.414039000  | -3.546640000 | 0.000000000 |
| C  | 1.872697000  | 0.092331000  | 0.000000000 |
| C  | 0.490401000  | -2.457929000 | 0.000000000 |
| In | 0.000000000  | 0.960894000  | 0.000000000 |
| C  | -1.548164000 | -0.851845000 | 0.000000000 |
| C  | -0.620353000 | -1.733757000 | 0.000000000 |
| H  | 2.730065000  | 0.768565000  | 0.000000000 |

### 1e

|    |             |              |              |
|----|-------------|--------------|--------------|
| C  | 0.000000000 | 1.470034000  | -1.525170000 |
| H  | 0.000000000 | -1.199993000 | -3.646010000 |
| C  | 0.000000000 | -1.470034000 | -1.525170000 |
| C  | 0.000000000 | 0.683920000  | -2.680535000 |
| Tl | 0.000000000 | 0.000000000  | 0.824750000  |
| Si | 0.000000000 | 2.636721000  | -0.323010000 |
| H  | 0.000000000 | 1.199993000  | -3.646010000 |
| C  | 0.000000000 | -0.683920000 | -2.680535000 |
| Si | 0.000000000 | -2.636721000 | -0.323010000 |

### 2e

|    |              |              |              |
|----|--------------|--------------|--------------|
| H  | -0.447887000 | -5.910663000 | 0.000000000  |
| Tl | -0.531263000 | 1.635093000  | 0.000000000  |
| C  | 0.558905000  | -5.503664000 | 0.000000000  |
| Si | 0.953773000  | -1.503265000 | 1.296077000  |
| C  | 0.776086000  | -4.197533000 | 0.000000000  |
| C  | 0.276535000  | -0.408932000 | 0.000000000  |
| H  | 1.382731000  | -6.210859000 | 0.000000000  |
| C  | 0.953773000  | -2.928139000 | 0.000000000  |
| Si | 0.953773000  | -1.503265000 | -1.296077000 |

### 3e

|    |              |              |             |
|----|--------------|--------------|-------------|
| C  | 2.031014000  | 0.090524000  | 0.000000000 |
| H  | 2.953704000  | -1.853889000 | 0.000000000 |
| C  | 2.022882000  | -1.273696000 | 0.000000000 |
| C  | -0.515371000 | -1.507976000 | 0.000000000 |
| Tl | 0.000000000  | 1.069948000  | 0.000000000 |
| C  | 0.806108000  | -2.009767000 | 0.000000000 |
| Si | -2.048658000 | -0.658042000 | 0.000000000 |
| H  | 3.008779000  | 0.581388000  | 0.000000000 |
| Si | -0.239220000 | -3.426800000 | 0.000000000 |

### 4e

|    |              |              |             |
|----|--------------|--------------|-------------|
| Si | 2.240510000  | -1.917642000 | 0.000000000 |
| Si | -2.551792000 | 0.312083000  | 0.000000000 |
| H  | 0.448526000  | -3.803169000 | 0.000000000 |
| C  | 1.890155000  | -0.154739000 | 0.000000000 |
| C  | 0.508775000  | -2.712984000 | 0.000000000 |
| Tl | 0.000000000  | 0.766562000  | 0.000000000 |
| C  | -1.584391000 | -1.175720000 | 0.000000000 |
| C  | -0.619686000 | -2.013454000 | 0.000000000 |
| H  | 2.740311000  | 0.530868000  | 0.000000000 |

### 1f

|    |              |              |              |
|----|--------------|--------------|--------------|
| H  | 0.000000000  | 0.000000000  | 2.884849761  |
| Si | -0.739758346 | 1.281299040  | 0.604999064  |
| C  | 0.000000000  | 0.000000000  | 1.802517712  |
| H  | 0.000000000  | 0.000000000  | -4.306952337 |
| Si | -0.739758346 | -1.281299040 | 0.604999064  |
| C  | 0.000000000  | 0.000000000  | -3.242888377 |
| Si | 1.479516692  | 0.000000000  | 0.604999064  |
| C  | 0.000000000  | 0.000000000  | -2.037741296 |
| C  | 0.000000000  | 0.000000000  | -0.633956279 |

### 2f

|    |              |              |              |
|----|--------------|--------------|--------------|
| Si | -2.307051000 | -0.078505000 | -0.001472000 |
| Si | 0.131523000  | 1.272892000  | -0.008086000 |
| C  | -0.644196000 | -0.500941000 | -0.720236000 |
| Si | 2.048330000  | -0.450493000 | 0.004114000  |
| H  | 0.778481000  | -0.177676000 | -2.338366000 |
| C  | 0.647439000  | -0.340481000 | -1.271126000 |
| C  | -0.645267000 | -0.491634000 | 0.725432000  |
| C  | 0.645666000  | -0.324012000 | 1.275910000  |
| H  | 0.775364000  | -0.147462000 | 2.341129000  |

### 3f

|    |             |              |              |
|----|-------------|--------------|--------------|
| C  | 0.000000000 | 1.242796503  | 0.603960473  |
| C  | 0.000000000 | 0.682487001  | 1.900767480  |
| H  | 0.000000000 | -1.294960503 | 2.798741984  |
| H  | 0.000000000 | 1.294960503  | 2.798741984  |
| Si | 0.000000000 | 0.000000000  | -0.862044533 |
| C  | 0.000000000 | -0.682487001 | 1.900767480  |
| Si | 0.000000000 | -2.335034505 | -0.744138038 |
| Si | 0.000000000 | 2.335034505  | -0.744138038 |
| C  | 0.000000000 | -1.242796503 | 0.603960473  |

### 4f

|    |              |              |             |
|----|--------------|--------------|-------------|
| C  | 0.432533000  | 2.254506000  | 0.000000000 |
| H  | -1.719312000 | 2.519422000  | 0.000000000 |
| C  | -0.875491000 | 1.833054000  | 0.000000000 |
| C  | 0.095724000  | -0.413083000 | 0.000000000 |
| Si | 1.594225000  | 0.852001000  | 0.000000000 |
| C  | -1.061473000 | 0.436889000  | 0.000000000 |
| Si | 1.632909000  | -1.382139000 | 0.000000000 |
| H  | 0.703732000  | 3.304452000  | 0.000000000 |
| Si | -1.674241000 | -1.205200000 | 0.000000000 |

### 1g

|    |              |              |              |
|----|--------------|--------------|--------------|
| Si | -2.325359000 | -0.163185000 | -0.000751000 |
| Ge | 0.167896000  | 1.418965000  | -0.009075000 |
| C  | -0.647295000 | -0.469721000 | -0.722819000 |
| Si | 2.038578000  | -0.466231000 | 0.004208000  |
| H  | 0.778799000  | -0.222841000 | -2.351848000 |
| C  | 0.646141000  | -0.349479000 | -1.279548000 |
| C  | -0.648306000 | -0.460417000 | 0.727502000  |
| C  | 0.644363000  | -0.332948000 | 1.284433000  |
| H  | 0.775473000  | -0.192455000 | 2.355197000  |

### 2g

|    |              |              |              |
|----|--------------|--------------|--------------|
| Si | -2.906839000 | -0.011738000 | -0.062969000 |
| H  | -0.606514000 | 1.141486000  | -0.928104000 |
| C  | -1.824586000 | -0.005319000 | -0.028357000 |
| H  | 4.310554000  | -0.003939000 | -0.023605000 |
| Si | -0.605898000 | -1.385343000 | -0.496209000 |
| C  | 3.246580000  | -0.002767000 | -0.017310000 |
| Ge | -0.633498000 | 0.268676000  | 1.573512000  |
| C  | 2.040618000  | -0.001079000 | -0.010081000 |
| C  | 0.638876000  | -0.000024000 | -0.000976000 |

### 3g

### 4g

|    |              |             |              |
|----|--------------|-------------|--------------|
| C  | 1.271339503  | 0.000000000 | -0.868608344 |
| C  | 0.682394001  | 0.000000000 | -2.145494351 |
| H  | -1.286519503 | 0.000000000 | -3.049836856 |
| H  | 1.286519503  | 0.000000000 | -3.049836856 |
| Ge | 0.000000000  | 0.000000000 | 0.731066165  |
| C  | -0.682394001 | 0.000000000 | -2.145494351 |
| Si | -2.402657006 | 0.000000000 | 0.436861164  |
| Si | 2.402657006  | 0.000000000 | 0.436861164  |
| C  | -1.271339503 | 0.000000000 | -0.868608344 |

### 1h

|    |              |              |              |
|----|--------------|--------------|--------------|
| Si | -2.337992000 | -0.261038000 | -0.000135000 |
| Sn | 0.200747000  | 1.649145000  | -0.010680000 |
| C  | -0.648442000 | -0.450601000 | -0.723525000 |
| Si | 2.026610000  | -0.487877000 | 0.004355000  |
| H  | 0.778073000  | -0.288367000 | -2.366121000 |
| C  | 0.643900000  | -0.358475000 | -1.288570000 |
| C  | -0.649469000 | -0.441278000 | 0.727997000  |
| C  | 0.642096000  | -0.341911000 | 1.293617000  |
| H  | 0.774766000  | -0.257910000 | 2.370361000  |

### 3h

|    |              |              |              |
|----|--------------|--------------|--------------|
| H  | -2.924041000 | 0.182748000  | 0.069401000  |
| Si | -0.594549000 | 1.101332000  | -0.953379000 |
| C  | -1.847054000 | 0.070825000  | 0.027005000  |
| H  | 4.326949000  | 0.075983000  | 0.029195000  |
| Sn | -0.684682000 | -1.710345000 | -0.631735000 |
| C  | 3.263450000  | 0.050900000  | 0.019165000  |
| Si | -0.594082000 | 0.214749000  | 1.441572000  |
| C  | 2.056425000  | 0.025235000  | 0.008700000  |
| C  | 0.656879000  | -0.011473000 | -0.004023000 |

### 1i

|    |              |              |              |
|----|--------------|--------------|--------------|
| Si | -2.339233000 | -0.297749000 | 0.000099000  |
| Pb | 0.219780000  | 1.754880000  | -0.011549000 |
| C  | -0.648861000 | -0.447768000 | -0.724328000 |
| Si | 2.020711000  | -0.484075000 | 0.004362000  |
| H  | 0.774654000  | -0.317099000 | -2.371657000 |
| C  | 0.641788000  | -0.368949000 | -1.292609000 |
| C  | -0.649900000 | -0.438432000 | 0.728822000  |
| C  | 0.639968000  | -0.352382000 | 1.297843000  |
| H  | 0.771383000  | -0.286738000 | 2.376316000  |

### 3i

|    |              |              |              |
|----|--------------|--------------|--------------|
| H  | -2.930013000 | -0.185809000 | 0.154607000  |
| Pb | -0.702964000 | 1.480982000  | -1.228694000 |
| C  | -1.855529000 | -0.075121000 | 0.063172000  |
| H  | 4.333883000  | -0.071686000 | 0.060788000  |
| Si | -0.592376000 | -1.348522000 | -0.538164000 |
| C  | 3.270532000  | -0.050939000 | 0.042707000  |
| Si | -0.591903000 | 0.281516000  | 1.425013000  |
| C  | 2.062438000  | -0.031555000 | 0.027103000  |
| C  | 0.665225000  | 0.001089000  | -0.000634000 |

### 1j

|    |             |              |              |
|----|-------------|--------------|--------------|
| Ge | 0.000000000 | 2.429114000  | 0.533069000  |
| Ge | 0.000000000 | -2.429114000 | 0.533069000  |
| C  | 0.000000000 | 1.243224000  | -0.863348000 |
| C  | 0.000000000 | -1.243224000 | -0.863348000 |
| C  | 0.000000000 | 0.685080000  | -2.159131000 |
| H  | 0.000000000 | -1.295676000 | -3.058723000 |
| C  | 0.000000000 | -0.685080000 | -2.159131000 |
| Si | 0.000000000 | 0.000000000  | 0.590769000  |
| H  | 0.000000000 | 1.295676000  | -3.058723000 |

### 3j

|    |              |              |              |
|----|--------------|--------------|--------------|
| H  | 2.806677000  | 1.774498000  | -0.000136000 |
| Si | -2.953064000 | -0.118305000 | -0.000067000 |
| H  | 0.911965000  | 3.282836000  | -0.000157000 |
| Ge | -0.689801000 | -0.695622000 | -0.000011000 |
| C  | 1.815361000  | 1.316827000  | -0.000081000 |
| C  | -1.653159000 | 1.168969000  | 0.000204000  |
| C  | 0.751979000  | 2.205241000  | -0.000093000 |
| C  | -0.529232000 | 1.741023000  | 0.000120000  |
| Ge | 1.793381000  | -0.616673000 | 0.000021000  |

### 1k

|    |              |              |              |
|----|--------------|--------------|--------------|
| C  | 0.427530000  | 2.265589000  | 0.000105000  |
| H  | -1.720690000 | 2.539587000  | -0.000396000 |
| C  | -0.880893000 | 1.848385000  | -0.000254000 |
| C  | 0.067143000  | -0.419401000 | 0.000376000  |
| Si | 1.552285000  | 0.834199000  | 0.000221000  |
| C  | -1.077211000 | 0.450323000  | 0.000011000  |
| Ge | 1.738475000  | -1.435973000 | -0.000567000 |
| H  | 0.706069000  | 3.313139000  | 0.000220000  |
| Si | -1.684103000 | -1.195947000 | 0.000284000  |

### 2h

|    |              |              |              |
|----|--------------|--------------|--------------|
| C  | 0.414012000  | 2.283000000  | -0.000020000 |
| H  | -1.730864000 | 2.569459000  | 0.000070000  |
| C  | -0.896129000 | 1.872700000  | 0.000023000  |
| C  | 0.037869000  | -0.399213000 | -0.000047000 |
| Si | 1.514668000  | 0.828742000  | -0.000060000 |
| C  | -1.104059000 | 0.473085000  | -0.000008000 |
| Sn | 1.892303000  | -1.578197000 | 0.000093000  |
| H  | 0.697256000  | 3.329127000  | -0.000012000 |
| Si | -1.696449000 | -1.178802000 | -0.000039000 |

### 4h

|    |             |              |              |
|----|-------------|--------------|--------------|
| C  | 0.000000000 | 1.343466003  | 1.154841354  |
| C  | 0.000000000 | 0.681234002  | 2.390120862  |
| H  | 0.000000000 | -1.260191003 | 3.312269366  |
| H  | 0.000000000 | 1.260191003  | 3.312269366  |
| Sn | 0.000000000 | 0.000000000  | -0.746398652 |
| C  | 0.000000000 | -0.681234002 | 2.390120862  |
| Si | 0.000000000 | -2.561827006 | -0.040401654 |
| Si | 0.000000000 | 2.561827006  | -0.040401654 |
| C  | 0.000000000 | -1.343466003 | 1.154841354  |

### 2i

|    |              |              |              |
|----|--------------|--------------|--------------|
| C  | 0.408960000  | 2.286836000  | -0.000004000 |
| H  | -1.733447000 | 2.589237000  | 0.000009000  |
| C  | -0.903543000 | 1.886767000  | 0.000012000  |
| C  | 0.011150000  | -0.395805000 | -0.000009000 |
| Si | 1.488928000  | 0.813906000  | 0.000007000  |
| C  | -1.122030000 | 0.486212000  | 0.000001000  |
| Pb | 1.986290000  | -1.626904000 | 0.000006000  |
| H  | 0.701086000  | 3.330479000  | -0.000014000 |
| Si | -1.708787000 | -1.170826000 | -0.000009000 |

### 4i

|    |             |              |              |
|----|-------------|--------------|--------------|
| C  | 0.000000000 | -1.392697503 | -1.470708693 |
| C  | 0.000000000 | -0.681834502 | -2.672711200 |
| H  | 0.000000000 | 1.240949003  | -3.607665703 |
| H  | 0.000000000 | -1.240949003 | -3.607665703 |
| Pb | 0.000000000 | 0.000000000  | 0.594973313  |
| C  | 0.000000000 | 0.681834502  | -2.672711200 |
| Si | 0.000000000 | 2.623321506  | -0.304298184 |
| Si | 0.000000000 | -2.623321506 | -0.304298184 |
| C  | 0.000000000 | 1.392697503  | -1.470708693 |

### 2j

|    |              |              |              |
|----|--------------|--------------|--------------|
| H  | 2.099525000  | 2.836656000  | 0.000066000  |
| Ge | -2.097455000 | -0.197115000 | -0.000089000 |
| C  | 1.390875000  | 2.011253000  | 0.000045000  |
| Ge | 0.352321000  | -0.748794000 | 0.000170000  |
| C  | 1.827020000  | 0.675230000  | -0.000106000 |
| C  | -0.698365000 | 0.975664000  | -0.000040000 |
| H  | -0.454386000 | 3.148725000  | 0.000118000  |
| C  | 0.033450000  | 2.176355000  | 0.000079000  |
| Si | 2.777233000  | -0.767666000 | -0.000190000 |

### 4j

|    |              |              |              |
|----|--------------|--------------|--------------|
| Si | 0.285470000  | -0.621536000 | -0.000249000 |
| H  | -3.284474000 | 1.562198000  | 0.000596000  |
| C  | 1.199480000  | 1.144289000  | -0.000336000 |
| C  | -2.273764000 | 1.150413000  | 0.000292000  |
| Ge | 2.583536000  | -0.225521000 | 0.000136000  |
| C  | -1.250968000 | 2.083337000  | 0.000123000  |
| C  | 0.048971000  | 1.662716000  | -0.000404000 |
| Ge | -2.133736000 | -0.782592000 | 0.000007000  |
| H  | -1.448026000 | 3.154381000  | 0.000268000  |

### 2k

|    |                 |                 |                 |
|----|-----------------|-----------------|-----------------|
| C  | 1.359244005534  | 0.105510771999  | 0.000000000000  |
| H  | 1.497128802816  | 2.323475921394  | 0.000000000000  |
| C  | 2.714100041155  | -0.262496569732 | 0.000000000000  |
| N  | 3.811462631557  | -0.622821144836 | 0.000000000000  |
| Pb | -0.254867477926 | -0.070504001057 | 1.740427709033  |
| Pb | -0.254867477926 | -0.070504001057 | -1.740427709033 |
| C  | -0.567282616815 | 1.485727841648  | 0.000000000000  |
| C  | 0.850384848658  | 1.444517397726  | 0.000000000000  |
| H  | -1.136540759514 | 2.408158679370  | 0.000000000000  |

|    |                 |                |                 |
|----|-----------------|----------------|-----------------|
| C  | -0.691796000000 | 0.000000000000 | -2.838378437460 |
| Pb | 2.276679000000  | 0.000000000000 | 0.290744562540  |
| N  | 0.000000000000  | 0.000000000000 | -0.675126437460 |
| H  | 1.339453000000  | 0.000000000000 | -3.702398437460 |
| Pb | -2.276679000000 | 0.000000000000 | 0.290744562540  |
| H  | -1.339453000000 | 0.000000000000 | -3.702398437460 |
| C  | 1.114196000000  | 0.000000000000 | -1.495769437460 |
| C  | -1.114196000000 | 0.000000000000 | -1.495769437460 |
| C  | 0.691796000000  | 0.000000000000 | -2.838378437460 |

### 3k

|    |                 |                 |                 |
|----|-----------------|-----------------|-----------------|
| Pb | -2.528523647579 | -0.257559572686 | 0.000000000000  |
| Pb | 2.555654310021  | 0.018689444802  | 0.000000000000  |
| H  | -1.908847994114 | 2.450278211186  | 0.897553142562  |
| C  | -0.479513338443 | -1.104867369149 | 0.000000000000  |
| C  | -0.118636082672 | 1.936119336300  | 0.000000000000  |
| C  | -1.511648188557 | 1.973008120948  | 0.000000000000  |
| N  | 1.040251270333  | 1.844341915939  | 0.000000000000  |
| C  | 0.746323874061  | -1.228089687302 | 0.000000000000  |
| H  | -1.908847994114 | 2.450278211186  | -0.897553142562 |

### 4k

|    |                 |                 |                |
|----|-----------------|-----------------|----------------|
| Pb | -2.295550340166 | -0.120790335707 | 0.000000000000 |
| Pb | 2.069319129768  | -0.383806229422 | 0.000000000000 |
| C  | -0.564946263686 | 1.298070340464  | 0.000000000000 |
| C  | 2.662650732912  | 2.010698213097  | 0.000000000000 |
| H  | -0.378435580574 | 3.464079926756  | 0.000000000000 |
| H  | 3.731942812480  | 2.069512966968  | 0.000000000000 |
| C  | 0.111841414759  | 2.500997124387  | 0.000000000000 |
| C  | 1.480104674358  | 2.381184906951  | 0.000000000000 |
| N  | -0.043187470574 | 0.076838701119  | 0.000000000000 |

### 1m

|    |              |              |              |
|----|--------------|--------------|--------------|
| Ge | -0.747591000 | 1.320929000  | -0.403450000 |
| Ge | 2.385839000  | -0.175737000 | -0.098471000 |
| H  | -2.517472000 | 0.133221000  | 1.772364000  |
| H  | -0.342613000 | 1.257059000  | 2.576735000  |
| C  | -1.558492000 | -0.054680000 | 1.297613000  |
| C  | 0.451811000  | -0.607790000 | -0.184908000 |
| C  | -0.381733000 | 0.583722000  | 1.727363000  |
| C  | 0.738665000  | 0.256585000  | 0.901168000  |
| As | -1.355300000 | -1.194073000 | -0.235994000 |

### 2m

|    |              |              |              |
|----|--------------|--------------|--------------|
| H  | 0.965234102  | 2.386945130  | 0.000000000  |
| C  | 3.706755790  | -0.216654913 | 0.000000000  |
| Ge | -0.611613549 | 0.562245117  | -1.500784500 |
| H  | 4.761751248  | -0.383191509 | 0.000000000  |
| C  | 0.456891046  | 1.427456257  | 0.000000000  |
| Ge | -0.611613549 | 0.562245117  | 1.500784500  |
| As | -0.122341868 | -1.354119206 | 0.000000000  |
| C  | 2.517828941  | -0.025446282 | 0.000000000  |
| C  | 1.136650956  | 0.173719098  | 0.000000000  |

### 3m

|    |              |             |              |
|----|--------------|-------------|--------------|
| C  | -0.691065000 | 0.000000000 | 2.070749795  |
| C  | -1.300881000 | 0.000000000 | 0.794931795  |
| As | 0.000000000  | 0.000000000 | -0.689397205 |
| C  | 1.300881000  | 0.000000000 | 0.794931795  |
| C  | 0.691065000  | 0.000000000 | 2.070749795  |
| H  | -1.279134000 | 0.000000000 | 2.981544795  |
| H  | 1.279134000  | 0.000000000 | 2.981544795  |
| Ge | -2.921638000 | 0.000000000 | -0.156485205 |
| Ge | 2.921638000  | 0.000000000 | -0.156485205 |

### 4m

|    |              |              |             |
|----|--------------|--------------|-------------|
| H  | -2.033135810 | 3.018047678  | 0.000000000 |
| Ge | 2.334199186  | 0.152028438  | 0.000000000 |
| C  | -1.277462580 | 2.240433559  | 0.000000000 |
| Ge | -0.462181431 | -1.687841392 | 0.000000000 |
| H  | 0.499900657  | 3.466820780  | 0.000000000 |
| C  | 0.079391832  | 2.466936295  | 0.000000000 |
| C  | 0.176024683  | 0.080188530  | 0.000000000 |
| As | -1.800100409 | 0.452626090  | 0.000000000 |
| C  | 0.857756585  | 1.302702292  | 0.000000000 |

### 1n

|    |              |              |              |
|----|--------------|--------------|--------------|
| Si | 2.421002004  | -0.257600959 | 0.000000000  |
| H  | -0.859855997 | -0.277254767 | -2.311607000 |
| C  | 0.684921002  | -0.296198857 | 0.719353000  |
| C  | -0.617941001 | -0.349756781 | -1.255965000 |
| C  | -0.617941001 | -0.349756781 | 1.255965000  |
| Si | -0.351042897 | 1.417395203  | 0.000000000  |
| H  | -0.859855997 | -0.277254767 | 2.311607000  |
| C  | 0.684921002  | -0.296198857 | -0.719353000 |
| P  | -1.865626012 | -0.529018708 | 0.000000000  |

### 2n

|    |              |             |              |
|----|--------------|-------------|--------------|
| C  | 0.686256000  | 0.000000000 | 1.901269562  |
| C  | 1.230127000  | 0.000000000 | 0.607826562  |
| C  | -1.230127000 | 0.000000000 | 0.607826562  |
| C  | -0.686256000 | 0.000000000 | 1.901269562  |
| H  | 1.307232000  | 0.000000000 | 2.790390562  |
| H  | -1.307232000 | 0.000000000 | 2.790390562  |
| Si | 2.333347000  | 0.000000000 | -0.768052438 |
| Si | -2.333347000 | 0.000000000 | -0.768052438 |
| P  | 0.000000000  | 0.000000000 | -0.738278438 |

### 3n

|    |              |              |             |
|----|--------------|--------------|-------------|
| Si | -2.269920153 | 0.184850320  | 0.000000000 |
| H  | 2.453212277  | 2.087107221  | 0.000000000 |
| Si | 0.146784662  | -2.012052684 | 0.000000000 |
| C  | 1.530857746  | 1.518451459  | 0.000000000 |
| C  | -0.755472897 | 1.086897571  | 0.000000000 |
| C  | 0.259762304  | 2.053462409  | 0.000000000 |
| C  | -0.284970786 | -0.258773041 | 0.000000000 |
| P  | 1.544957185  | -0.223756530 | 0.000000000 |
| H  | 0.070602422  | 3.121766253  | 0.000000000 |

### 4n

|    |              |              |              |
|----|--------------|--------------|--------------|
| P  | 0.000000000  | 0.000000000  | -2.993410413 |
| H  | 0.000000000  | -2.181303000 | 0.569383587  |
| C  | 0.000000000  | 0.000000000  | -1.453359413 |
| C  | 0.000000000  | -1.139001000 | 0.858031587  |
| Si | -1.373619000 | 0.000000000  | 1.592269587  |
| Si | 1.373619000  | 0.000000000  | 1.592269587  |
| C  | 0.000000000  | 0.000000000  | -0.056381413 |
| C  | 0.000000000  | 1.139001000  | 0.858031587  |
| H  | 0.000000000  | 2.181303000  | 0.569383587  |

### 1p

|    |             |              |              |
|----|-------------|--------------|--------------|
| Si | 0.000000000 | 2.455749000  | 0.523706000  |
| Si | 0.000000000 | -2.455749000 | 0.523706000  |
| C  | 0.000000000 | 1.266258000  | -0.766372000 |
| C  | 0.000000000 | -1.266258000 | -0.766372000 |
| H  | 0.000000000 | 1.296933000  | -2.934104000 |
| C  | 0.000000000 | -0.686125000 | -2.036596000 |
| C  | 0.000000000 | 0.686125000  | -2.036596000 |
| H  | 0.000000000 | -1.296933000 | -2.934104000 |
| As | 0.000000000 | 0.000000000  | 0.752729000  |

### 2p

|    |              |              |             |
|----|--------------|--------------|-------------|
| C  | -0.334541000 | -1.994993000 | 0.000000000 |
| Si | 1.870989000  | 2.441001000  | 0.000000000 |
| C  | 1.880301000  | 0.597702000  | 0.000000000 |
| H  | -0.762825000 | -2.996534000 | 0.000000000 |
| C  | 1.052183000  | -1.881297000 | 0.000000000 |
| C  | 1.573262000  | -0.632690000 | 0.000000000 |
| Si | 0.000000000  | 1.066092000  | 0.000000000 |
| H  | 1.702271000  | -2.752344000 | 0.000000000 |
| As | -1.580622000 | -0.602508000 | 0.000000000 |

### 3p

|    |              |              |              |
|----|--------------|--------------|--------------|
| C  | 0.227901000  | 0.810002000  | 0.000000000  |
| Si | -1.174924000 | -0.153155000 | 1.412613000  |
| C  | 1.298429000  | 1.705476000  | 0.000000000  |
| H  | -1.557041000 | 2.161006000  | 0.000000000  |
| Si | -1.174924000 | -0.153155000 | -1.412613000 |

### 4p

|    |              |              |             |
|----|--------------|--------------|-------------|
| H  | 1.116551000  | 4.311450000  | 0.000000000 |
| H  | -0.221005000 | -2.781455000 | 0.000000000 |
| Si | 0.934154000  | -0.678126000 | 1.317234000 |
| C  | 0.934154000  | 3.258934000  | 0.000000000 |
| C  | 0.051992000  | -1.733250000 | 0.000000000 |

|    |              |              |             |
|----|--------------|--------------|-------------|
| H  | 3.056165000  | 3.146405000  | 0.000000000 |
| C  | 2.231710000  | 2.466772000  | 0.000000000 |
| As | 0.481819000  | -1.144856000 | 0.000000000 |
| C  | -1.174924000 | 1.144610000  | 0.000000000 |

|    |              |               |              |
|----|--------------|---------------|--------------|
| C  | 0.730116000  | 2.071454000   | 0.000000000  |
| C  | 0.512961000  | 0.696805000   | 0.000000000  |
| Si | 0.934154000  | -0.678126000  | -1.317234000 |
| As | -1.225067000 | -0.2511700000 | 0.000000000  |

### 5p

|    |              |              |              |
|----|--------------|--------------|--------------|
| As | 1.641915000  | 0.120656000  | 0.000000000  |
| H  | -4.826238000 | 0.788131000  | 0.000000000  |
| H  | -0.208936000 | 2.066134000  | 0.000000000  |
| C  | -0.105678000 | 0.984011000  | 0.000000000  |
| C  | -3.776340000 | 0.591060000  | 0.000000000  |
| Si | -0.105678000 | -0.679582000 | 1.403073000  |
| C  | -2.593200000 | 0.376939000  | 0.000000000  |
| C  | -1.222954000 | 0.080053000  | 0.000000000  |
| Si | -0.105678000 | -0.679582000 | -1.403073000 |

### 6p

|    |              |              |             |
|----|--------------|--------------|-------------|
| C  | 0.000000000  | 1.410649000  | 0.000000000 |
| As | -1.729892000 | 0.832673000  | 0.000000000 |
| C  | -1.417450000 | -1.051753000 | 0.000000000 |
| H  | -2.256630000 | -1.739616000 | 0.000000000 |
| Si | 1.461262000  | 0.407060000  | 0.000000000 |
| H  | 0.117345000  | 2.492865000  | 0.000000000 |
| C  | -0.154552000 | -1.421193000 | 0.000000000 |
| Si | 2.959872000  | -1.344030000 | 0.000000000 |
| C  | 1.126979000  | -1.456685000 | 0.000000000 |

### 1q

|    |             |              |              |
|----|-------------|--------------|--------------|
| Si | 0.000000000 | 2.600215000  | 0.179110000  |
| Si | 0.000000000 | -2.600215000 | 0.179110000  |
| C  | 0.000000000 | 1.323815000  | -0.999674000 |
| C  | 0.000000000 | -1.323815000 | -0.999674000 |
| H  | 0.000000000 | 1.277085000  | -3.149599000 |
| C  | 0.000000000 | -0.685322000 | -2.237776000 |
| C  | 0.000000000 | 0.685322000  | -2.237776000 |
| H  | 0.000000000 | -1.277085000 | -3.149599000 |
| Sb | 0.000000000 | 0.000000000  | 0.786932000  |

### 2q

|    |              |              |             |
|----|--------------|--------------|-------------|
| C  | 0.583041000  | -1.906702000 | 0.000000000 |
| Si | 1.492263000  | 3.077813000  | 0.000000000 |
| C  | 1.947228000  | 1.294555000  | 0.000000000 |
| H  | 0.531035000  | -2.994170000 | 0.000000000 |
| C  | 1.840311000  | -1.326766000 | 0.000000000 |
| C  | 1.945359000  | 0.027324000  | 0.000000000 |
| Si | 0.000000000  | 1.307217000  | 0.000000000 |
| H  | 2.748277000  | -1.927053000 | 0.000000000 |
| Sb | -1.216993000 | -0.882346000 | 0.000000000 |

### 3q

|    |              |              |              |
|----|--------------|--------------|--------------|
| H  | -4.551980000 | 0.812306000  | 0.000000000  |
| H  | 2.716546000  | 0.701657000  | 0.000000000  |
| Si | 0.404661000  | 1.321890000  | 1.304388000  |
| C  | -3.485062000 | 0.767333000  | 0.000000000  |
| C  | 1.632971000  | 0.690713000  | 0.000000000  |
| C  | -2.279847000 | 0.722006000  | 0.000000000  |
| C  | -0.890198000 | 0.682379000  | 0.000000000  |
| Si | 0.404661000  | 1.321890000  | -1.304388000 |
| Sb | 0.404661000  | -1.092186000 | 0.000000000  |

### 4q

|    |              |              |              |
|----|--------------|--------------|--------------|
| C  | 0.085623000  | 1.098753000  | 0.000000000  |
| Si | -1.321794000 | 0.129993000  | 1.428541000  |
| C  | 1.127925000  | 2.025889000  | 0.000000000  |
| H  | -1.724982000 | 2.408388000  | 0.000000000  |
| Si | -1.321794000 | 0.129993000  | -1.428541000 |
| H  | 2.841272000  | 3.519748000  | 0.000000000  |
| C  | 2.039214000  | 2.814544000  | 0.000000000  |
| Sb | 0.476630000  | -1.051059000 | 0.000000000  |
| C  | -1.321794000 | 1.400156000  | 0.000000000  |

### 5q

|    |              |              |              |
|----|--------------|--------------|--------------|
| Sb | 1.481244000  | 0.113653000  | 0.000000000  |
| H  | -5.217829000 | 0.690426000  | 0.000000000  |
| H  | -0.645853000 | 2.040912000  | 0.000000000  |
| C  | -0.505448000 | 0.963426000  | 0.000000000  |
| C  | -4.165685000 | 0.507835000  | 0.000000000  |
| Si | -0.505448000 | -0.693885000 | 1.417685000  |
| C  | -2.979773000 | 0.309005000  | 0.000000000  |
| C  | -1.603630000 | 0.036589000  | 0.000000000  |
| Si | -0.505448000 | -0.693885000 | -1.417685000 |

### 6q

|    |              |              |             |
|----|--------------|--------------|-------------|
| C  | 0.000000000  | 1.367792000  | 0.000000000 |
| Sb | -1.660999000 | 0.224693000  | 0.000000000 |
| C  | -0.610488000 | -1.607070000 | 0.000000000 |
| H  | -1.138487000 | -2.555131000 | 0.000000000 |
| Si | 1.670313000  | 0.803239000  | 0.000000000 |
| H  | -0.170889000 | 2.443402000  | 0.000000000 |
| C  | 0.693689000  | -1.486872000 | 0.000000000 |
| Si | 3.619092000  | -0.414216000 | 0.000000000 |
| C  | 1.911577000  | -1.072839000 | 0.000000000 |

### 1r

|    |             |              |              |
|----|-------------|--------------|--------------|
| Si | 0.000000000 | 2.643397000  | -0.118915000 |
| Si | 0.000000000 | -2.643397000 | -0.118915000 |
| C  | 0.000000000 | 1.355740000  | -1.270942000 |
| C  | 0.000000000 | -1.355740000 | -1.270942000 |
| H  | 0.000000000 | 1.266127000  | -3.406010000 |
| C  | 0.000000000 | -0.686257000 | -2.485626000 |
| C  | 0.000000000 | 0.686257000  | -2.485626000 |
| H  | 0.000000000 | -1.266127000 | -3.406010000 |
| Bi | 0.000000000 | 0.000000000  | 0.665307000  |

### 2r

|    |              |              |             |
|----|--------------|--------------|-------------|
| C  | 1.948382000  | 0.242812000  | 0.000000000 |
| Si | -1.617841000 | -3.415975000 | 0.000000000 |
| C  | 0.086683000  | -2.726729000 | 0.000000000 |
| H  | 2.820883000  | 0.893617000  | 0.000000000 |
| C  | 2.165216000  | -1.120971000 | 0.000000000 |
| C  | 1.107900000  | -1.977336000 | 0.000000000 |
| Si | -1.085075000 | -1.165208000 | 0.000000000 |
| H  | 3.170857000  | -1.539509000 | 0.000000000 |
| Bi | 0.000000000  | 1.184046000  | 0.000000000 |

### 3r

|    |              |              |              |
|----|--------------|--------------|--------------|
| H  | 0.943409000  | -4.716040000 | 0.000000000  |
| H  | -2.102300000 | 1.903499000  | 0.000000000  |
| Si | -1.596117000 | -0.432011000 | 1.298029000  |
| C  | 0.535512000  | -3.729352000 | 0.000000000  |
| C  | -1.596117000 | 0.945209000  | 0.000000000  |
| C  | 0.066991000  | -2.617204000 | 0.000000000  |
| C  | -0.480648000 | -1.341408000 | 0.000000000  |
| Si | -1.596117000 | -0.432011000 | -1.298029000 |
| Bi | 0.658985000  | 0.667053000  | 0.000000000  |

### 4r

|    |              |              |              |
|----|--------------|--------------|--------------|
| C  | 0.053107000  | -1.406615000 | 0.000000000  |
| Si | 1.457065000  | -0.441041000 | 1.431813000  |
| C  | -0.996052000 | -2.323335000 | 0.000000000  |
| H  | 1.864749000  | -2.711644000 | 0.000000000  |
| Si | 1.457065000  | -0.441041000 | -1.431813000 |
| H  | -2.721916000 | -3.803269000 | 0.000000000  |
| C  | -1.915050000 | -3.103893000 | 0.000000000  |
| Bi | -0.379940000 | 0.844544000  | 0.000000000  |
| C  | 1.457065000  | -1.705014000 | 0.000000000  |

### 5r

|    |              |              |             |
|----|--------------|--------------|-------------|
| Bi | 0.336998000  | 1.131589000  | 0.000000000 |
| H  | -2.584608000 | -5.045445000 | 0.000000000 |
| H  | -2.261523000 | -0.277904000 | 0.000000000 |
| C  | -1.205159000 | -0.530513000 | 0.000000000 |
| C  | -2.049241000 | -4.121674000 | 0.000000000 |

### 6r

|    |              |              |             |
|----|--------------|--------------|-------------|
| C  | -1.389128000 | -0.265001000 | 0.000000000 |
| Bi | 0.000000000  | 1.315817000  | 0.000000000 |
| C  | 1.726499000  | -0.063319000 | 0.000000000 |
| H  | 2.743520000  | 0.314404000  | 0.000000000 |
| Si | -1.031511000 | -1.987838000 | 0.000000000 |

|    |              |              |              |    |              |              |             |
|----|--------------|--------------|--------------|----|--------------|--------------|-------------|
| Si | 0.336998000  | -1.104730000 | 1.420145000  | H  | -2.434952000 | 0.040195000  | 0.000000000 |
| C  | -1.451550000 | -3.078093000 | 0.000000000  | C  | 1.396758000  | -1.325866000 | 0.000000000 |
| C  | -0.720827000 | -1.880742000 | 0.000000000  | Si | -0.075167000 | -4.072265000 | 0.000000000 |
| Si | 0.336998000  | -1.104730000 | -1.420145000 | C  | 0.796691000  | -2.466805000 | 0.000000000 |

### 1s

|    |              |             |              |
|----|--------------|-------------|--------------|
| C  | 0.691497000  | 0.000000000 | -2.381227315 |
| C  | 1.121819000  | 0.000000000 | -1.046762315 |
| N  | 0.000000000  | 0.000000000 | -0.208207315 |
| C  | -1.121819000 | 0.000000000 | -1.046762315 |
| C  | -0.691497000 | 0.000000000 | -2.381227315 |
| H  | 1.339267000  | 0.000000000 | -3.245408315 |
| H  | -1.339267000 | 0.000000000 | -3.245408315 |
| Ge | 1.945757000  | 0.000000000 | 0.620444685  |
| Ge | -1.945757000 | 0.000000000 | 0.620444685  |

### 2s

|    |             |              |              |
|----|-------------|--------------|--------------|
| H  | 0.000000000 | 0.000000000  | 4.518160649  |
| H  | 0.000000000 | 0.000000000  | -4.051119304 |
| N  | 0.000000000 | 0.000000000  | 3.520090615  |
| C  | 0.000000000 | 0.000000000  | -2.979795384 |
| C  | 0.000000000 | 0.000000000  | 2.358916576  |
| C  | 0.000000000 | 0.000000000  | -1.757780474 |
| Ge | 0.000000000 | 1.449642000  | -0.226441002 |
| C  | 0.000000000 | 0.000000000  | 1.021586531  |
| Ge | 0.000000000 | -1.449642000 | -0.226441002 |

### 3s

|    |              |              |             |
|----|--------------|--------------|-------------|
| Ge | -1.812222210 | 0.873793580  | 0.000000000 |
| C  | -1.145162548 | -1.141609536 | 0.000000000 |
| C  | -0.053969701 | -0.459039442 | 0.000000000 |
| C  | -2.515633690 | -1.006399303 | 0.000000000 |
| H  | -3.627192548 | -2.788210747 | 0.000000000 |
| Ge | 2.891214202  | -0.071597973 | 0.000000000 |
| N  | 1.201332560  | -0.253340470 | 0.000000000 |
| H  | -4.605747100 | -1.210770881 | 0.000000000 |
| C  | -3.642410702 | -1.703118843 | 0.000000000 |

### 4s

|    |              |              |             |
|----|--------------|--------------|-------------|
| H  | -1.964267698 | 2.220455406  | 0.000000000 |
| Ge | 2.574598394  | -0.156477524 | 0.000000000 |
| H  | 0.205814447  | 2.729040455  | 0.000000000 |
| N  | -1.370641629 | 1.394426724  | 0.000000000 |
| C  | 0.596267883  | -0.719493824 | 0.000000000 |
| C  | -0.080304628 | 1.678773665  | 0.000000000 |
| C  | -0.634566802 | -0.988117076 | 0.000000000 |
| Ge | -2.421413789 | -0.288216363 | 0.000000000 |
| C  | 0.922079108  | 0.725348600  | 0.000000000 |

### 5s

|    |              |              |              |
|----|--------------|--------------|--------------|
| H  | 0.000000000  | 2.189210000  | 0.433659000  |
| H  | 0.000000000  | -2.189210000 | 0.433659000  |
| C  | 0.000000000  | 1.155857000  | 0.109394000  |
| Ge | 1.465349000  | 0.000000000  | -0.737579000 |
| Ge | -1.465349000 | 0.000000000  | -0.737579000 |
| N  | 0.000000000  | 0.000000000  | 3.545084000  |
| C  | 0.000000000  | -1.155857000 | 0.109394000  |
| C  | 0.000000000  | 0.000000000  | 2.393417000  |
| C  | 0.000000000  | 0.000000000  | 0.974825000  |

### 6s

|    |              |              |             |
|----|--------------|--------------|-------------|
| H  | 1.151149000  | 2.406546000  | 0.000000000 |
| Ge | -0.046990000 | -1.473817000 | 0.000000000 |
| H  | 3.383284000  | 1.334618000  | 0.000000000 |
| C  | 2.382716000  | -0.598290000 | 0.000000000 |
| C  | 1.193793000  | 1.317190000  | 0.000000000 |
| C  | 0.000000000  | 0.526614000  | 0.000000000 |
| C  | 2.458702000  | 0.776065000  | 0.000000000 |
| Ge | -1.659118000 | 1.349830000  | 0.000000000 |
| N  | 1.978532000  | -1.700434000 | 0.000000000 |

### 7s

|    |              |              |             |
|----|--------------|--------------|-------------|
| Ge | 0.041410000  | 2.944529000  | 0.000000000 |
| Ge | -0.001825000 | -2.846259000 | 0.000000000 |
| C  | 1.151244000  | 0.223413000  | 0.000000000 |
| C  | 0.659723000  | -1.058325000 | 0.000000000 |
| H  | 2.189898000  | 0.519236000  | 0.000000000 |
| C  | 0.000000000  | 1.083971000  | 0.000000000 |
| C  | -1.154407000 | 0.237932000  | 0.000000000 |
| H  | -2.200899000 | 0.510328000  | 0.000000000 |
| N  | -0.742156000 | -1.013738000 | 0.000000000 |

### 1t

|    |              |             |              |
|----|--------------|-------------|--------------|
| C  | 0.687205000  | 0.000000000 | 2.214282606  |
| C  | 1.237979000  | 0.000000000 | 0.923120606  |
| P  | 0.000000000  | 0.000000000 | -0.396414394 |
| C  | -1.237979000 | 0.000000000 | 0.923120606  |
| C  | -0.687205000 | 0.000000000 | 2.214282606  |
| H  | 1.302029000  | 0.000000000 | 3.107451606  |
| H  | -1.302029000 | 0.000000000 | 3.107451606  |
| Ge | 2.469557000  | 0.000000000 | -0.468621394 |
| Ge | -2.469557000 | 0.000000000 | -0.468621394 |

### 2t

|    |              |              |              |
|----|--------------|--------------|--------------|
| H  | -2.186340000 | 0.000000000  | 0.167257668  |
| H  | 2.186340000  | 0.000000000  | 0.167257668  |
| C  | -1.151513000 | 0.000000000  | -0.149145332 |
| Ge | 0.000000000  | 1.462175000  | -0.982829332 |
| Ge | 0.000000000  | -1.462175000 | -0.982829332 |
| P  | 0.000000000  | 0.000000000  | 3.680167668  |
| C  | 1.151513000  | 0.000000000  | -0.149145332 |
| C  | 0.000000000  | 0.000000000  | 2.140345668  |
| C  | 0.000000000  | 0.000000000  | 0.739566668  |

### 3t

|    |              |              |             |
|----|--------------|--------------|-------------|
| H  | 0.482266086  | -3.132036563 | 0.000000000 |
| Ge | -0.435071076 | 0.791621494  | 0.000000000 |
| H  | -2.119063262 | -3.027976414 | 0.000000000 |
| C  | -1.938519509 | -0.868765841 | 0.000000000 |
| C  | -0.089564789 | -2.207498470 | 0.000000000 |
| C  | 0.540213963  | -0.941435855 | 0.000000000 |
| C  | -1.455253466 | -2.169231682 | 0.000000000 |
| Ge | 2.085239836  | 0.073819421  | 0.000000000 |
| P  | -2.744791698 | 0.531945765  | 0.000000000 |

### 4t

|    |              |              |             |
|----|--------------|--------------|-------------|
| Ge | -2.817920000 | 1.228815000  | 0.000000000 |
| Ge | 2.856880000  | -0.433095000 | 0.000000000 |
| C  | 0.000000000  | 0.917682000  | 0.000000000 |
| C  | 1.081730000  | 0.051132000  | 0.000000000 |
| H  | 0.107545000  | 1.998397000  | 0.000000000 |
| C  | -1.237373000 | 0.226503000  | 0.000000000 |
| C  | -1.089375000 | -1.189151000 | 0.000000000 |
| H  | -1.907593000 | -1.899051000 | 0.000000000 |
| P  | 0.534897000  | -1.706624000 | 0.000000000 |

### 5t

|    |              |              |             |
|----|--------------|--------------|-------------|
| H  | -0.580266000 | -3.329707000 | 0.000000000 |
| Ge | -1.545431000 | 2.297367000  | 0.000000000 |
| H  | -2.545056000 | -1.383830000 | 0.000000000 |

### 6t

|    |              |              |             |
|----|--------------|--------------|-------------|
| Ge | -2.171467714 | 0.881760056  | 0.000000000 |
| C  | -1.598909424 | -1.142251694 | 0.000000000 |
| C  | -0.568458968 | -0.330732723 | 0.000000000 |

|    |              |              |             |    |              |              |             |
|----|--------------|--------------|-------------|----|--------------|--------------|-------------|
| P  | -0.183995000 | -1.975654000 | 0.000000000 | C  | -2.946158284 | -1.084854277 | 0.000000000 |
| C  | 0.000000000  | 0.992082000  | 0.000000000 | H  | -4.111541465 | -2.821071945 | 0.000000000 |
| C  | -1.548630000 | -0.951155000 | 0.000000000 | Ge | 3.305195189  | -0.082407231 | 0.000000000 |
| C  | 1.000146000  | 0.200656000  | 0.000000000 | P  | 1.161199719  | -0.113112639 | 0.000000000 |
| Ge | 2.085513000  | -1.346511000 | 0.000000000 | H  | -5.046587275 | -1.212399232 | 0.000000000 |
| C  | -1.351082000 | 0.411906000  | 0.000000000 | C  | -4.098491603 | -1.735588205 | 0.000000000 |

7t

|    |             |              |              |
|----|-------------|--------------|--------------|
| H  | 0.000000000 | 0.000000000  | 4.958474000  |
| H  | 0.000000000 | 0.000000000  | -4.412190000 |
| P  | 0.000000000 | 0.000000000  | 3.567158000  |
| C  | 0.000000000 | 0.000000000  | -3.341039000 |
| C  | 0.000000000 | 0.000000000  | 2.014324000  |
| C  | 0.000000000 | 0.000000000  | -2.118280000 |
| Ge | 0.000000000 | 1.438240000  | -0.586114000 |
| C  | 0.000000000 | 0.000000000  | 0.687932000  |
| Ge | 0.000000000 | -1.438240000 | -0.586114000 |

## References

- O. Yanez, R. Baez-Grez, D. Inostroza, W. A. Rabanal-Leon, R. Pino-Rios, J. Garza and W. Tiznado, *J. Chem. Theory Comput.*, 2019, **15**, 1463-1475.
- C. Adamo and V. Barone, *J. Chem. Phys.*, 1999, **110**, 6158-6170.
- S. Grimme, J. Antony, S. Ehrlich and H. Krieg, *J. Chem. Phys.*, 2010, **132**, 154104.
- P. Fuentealba, H. Preuss, H. Stoll and L. Von Szentpály, *Chem. Phys. Lett.*, 1982, **89**, 418-422.
- P. Fuentealba, L. v. Szentpaly, H. Preuss and H. Stoll, *J. Phys. B: Atom. Mol. Phys.*, 1985, **18**, 1287.
- W. Küchle, M. Dolg, H. Stoll and H. Preuss, *J. Chem. Phys.*, 1994, **100**, 7535-7542.
- W. Küchle, M. Dolg, H. Stoll and H. Preuss, *Mol. Phys.*, 1991, **74**, 1245-1263.
- A. Bergner, M. Dolg, W. Küchle, H. Stoll and H. Preuß, *Mol. Phys.*, 1993, **80**, 1431-1441.
- F. Weigend and R. Ahlrichs, *Phys. Chem. Chem. Phys.*, 2005, **7**, 3297-3305.
- C. Riplinger and F. Neese, *J. Chem. Phys.*, 2013, **138**, 034106.
- C. Riplinger, P. Pinski, U. Becker, E. F. Valeev and F. Neese, *J. Chem. Phys.*, 2016, **144**, 024109.
- C. Riplinger, B. Sandhoefer, A. Hansen and F. Neese, *J. Chem. Phys.*, 2013, **139**, 134101.
- D. G. Truhlar, *Chem. Phys. Lett.*, 1998, **294**, 45-48.
- F. Neese, A. Hansen and D. G. Liakos, *J. Chem. Phys.*, 2009, **131**, 064103.
- M. J. Frisch, G. W. Trucks, H. B. Schlegel, G. E. Scuseria, M. A. Robb, J. R. Cheeseman, G. Scalmani, V. Barone, G. A. Petersson, H. Nakatsuji, X. Li, M. Caricato, A. V. Marenich, J. Bloino, B. G. Janesko, R. Gomperts, B. Mennucci, H. P. Hratchian, J. V. Ortiz, A. F. Izmaylov, J. L. Sonnenberg, Williams, F. Ding, F. Lipparini, F. Egidi, J. Goings, B. Peng, A. Petrone, T. Henderson, D. Ranasinghe, V. G. Zakrzewski, J. Gao, N. Rega, G. Zheng, W. Liang, M. Hada, M. Ehara, K. Toyota, R. Fukuda, J. Hasegawa, M. Ishida, T. Nakajima, Y. Honda, O. Kitao, H. Nakai, T. Vreven, K. Throssell, J. A. Montgomery Jr., J. E. Peralta, F. Ogliaro, M. J. Bearpark, J. J. Heyd, E. N. Brothers, K. N. Kudin, V. N. Staroverov, T. A. Keith, R. Kobayashi, J. Normand, K. Raghavachari, A. P. Rendell, J. C. Burant, S. S. Iyengar, J. Tomasi, M. Cossi, J. M. Millam, M. Klene, C. Adamo, R. Cammi, J. W. Ochterski, R. L. Martin, K. Morokuma, O. Farkas, J. B. Foresman and D. J. Fox, 2016
- E. D. Glendening, C. R. Landis and F. Weinhold, *J. Comput. Chem.*, 2013, **34**, 1429-1437.
- D. Y. Zubarev and A. I. Boldyrev, *Phys. Chem. Chem. Phys.*, 2008, **10**, 5207-5217.
- D. Y. Zubarev and A. I. Boldyrev, *J. Org. Chem.*, 2008, **73**, 9251-9258.
- T. Lu and F. Chen, *J. Comput. Chem.*, 2012, **33**, 580-592.
- Legault, C. Y. *CYLVview20*, Université de Sherbrooke: 2020.
- W. Humphrey, A. Dalke and K. Schulten, *J. Mol. Graph.*, 1996, **14**, 33-38, 27-38.
- A. M. n. Pendás, M. A. Blanco and E. Francisco, *J. Chem. Phys.*, 2004, **120**, 4581-4592.
- A. M. Pendás, E. Francisco and M. A. Blanco, *J. Comput. Chem.*, 2005, **26**, 344-351.
- M. A. Blanco, A. Martín Pendás and E. Francisco, *J. Chem. Theory Comput.*, 2005, **1**, 1096-1109.
- A. M. Pendás, M. A. Blanco and E. Francisco, *J. Comput. Chem.*, 2007, **28**, 161-184.
- AIMAll (Version 19.10.12), Todd A. Keith, TK Gristmill Software, Overland Park KS, USA, 2019 (aim.tkgristmill.com).
- U. Ayachit, *The paraview guide: a parallel visualization application*, Kitware, Inc., 2015.
